# Supplementary material for: Vertical Gradient Temperature Difference of the Main Arch with Single Pipe Section in Tibet Based on Statistical Analysis
Source: Hindawi journal article supplement (doi:10.1155/2020/9767621), 2020-01-01
Supplement: f1 [file 9767621.f1.zip]

Archive with 2 entries (2 files):
- 9767621.f1/fig.8.xls
- 9767621.f1/fig.9.xls
