# Supplementary material for: Vertical Gradient Temperature Difference of the Main Arch with Single Pipe Section in Tibet Based on Statistical Analysis
Source: Hindawi journal article supplement (doi:10.1155/2020/9767621), 2020-01-01
Supplement: f1 [file 9767621.f1.zip › 9767621.f1/fig.8.xls]

## Sheet: Sheet1
summer	T1	T2						winter	T1	T2
1	6.6	8.4						1	-1.9	-1.3
2	6.2	8.9						2	-1.3	-1
3	6.1	7.8						3	-0.8	-0.8
4	5.6	7						4	-0.3	-0.4
5	4.9	6.6						5	0.2	-0.2
6	4.1	6						6	0.7	0.1
7	3.5	5.6						7	1.1	0.4
8	2.9	5.3						8	2.5	0.7
9	2.6	4.9						9	2.9	1.4
10	2.3	4.4						10	3.4	1.7
11	1.8	4.1						11	4.2	1.9
12	1.4	3.7						12	4.7	2.1
13	1	3.3						13	5.1	2.3
14	0.6	3						14	4.3	3.2
15	0.2	2.8						15	4.7	2.3
16	0	2.4						16	5	2.5
17	-0.4	2						17	5.2	2.7
18	-0.6	1.7						18	5.5	2.9
19	-1	1.3						19	5.6	3.1
20	-1.2	1.1						20	5.8	3.3
21	-1.5	0.9						21	5.9	3.4
22	-1.7	0.6						22	6.1	3.6
23	-1.9	0.3						23	6.2	3.8
24	-2.2	0.1						24	6.3	3.9
25	-2.4	-0.1						25	6.4	4
26	-2.8	-0.4						26	6.4	4.1
27	-3	-0.7						27	6.5	4.3
28	-3.3	-0.9						28	6.2	4.3
29	-3.5	-1.1						29	5.6	4.1
30	-3.7	-1.3						30	4.9	4
31	-3.9	-1.5						31	4.3	3.8
32	-4.1	-1.7						32	3.8	3.7
33	-4.2	-1.8						33	3.4	3.5
34	-4.4	-2.2						34	3	3.5
35	-4.6	-2.2						35	2.7	3.3
36	-4.8	-2.4						36	2.4	3.3
37	-4.9	-2.5						37	2.2	3.2
38	-5	-2.8						38	1.9	3.2
39	-5.1	-2.9						39	1.7	3
40	-5.3	-3.1						40	1.6	3
41	-5.5	-3.3						41	1.5	3
42	-5.7	-3.4						42	1.2	2.9
43	-5.8	-3.7						43	1.2	2.8
44	-6	-3.8						44	1	2.7
45	-6.2	-4						45	0.9	2.7
46	-6.3	-4.1						46	0.7	2.5
47	-6.4	-4.3						47	0.6	2.4
48	-6.6	-4.4						48	0.4	2.3
49	-6.8	-4.5						49	0.3	2.2
50	-7	-4.6						50	0.1	2.1
51	-7	-4.8						51	0	2
52	-7.2	-5						52	-0.2	1.9
53	-7.3	-5						53	-0.3	1.8
54	-7.4	-5.2						54	-0.4	1.6
55	-7.6	-5.3						55	-0.5	1.6
56	-7.7	-5.4						56	-0.6	1.5
57	-7.8	-5.5						57	-0.8	1.4
58	-7.8	-5.6						58	-0.9	1.3
59	-7.9	-5.8						59	-0.9	1.3
60	-8	-5.9						60	-0.9	1.3
61	-8.1	-6						61	-0.9	1.3
62	-8.2	-6.1						62	-1	1.2
63	-8.2	-6.2						63	-1.1	1.2
64	-8.3	-6.2						64	-1.2	1
65	-8.5	-6.3						65	-1.3	0.9
66	-8.5	-6.4						66	-1.5	0.8
67	-8.6	-6.5						67	-1.6	0.7
68	-8.6	-6.5						68	-1.7	0.7
69	-8.8	-6.6						69	-1.8	0.6
70	-8.8	-6.6						70	-1.9	0.4
71	-8.8	-6.6						71	-1.9	0.3
72	-8.9	-6.7						72	-2	0.3
73	-8.8	-6.7						73	-2.1	0.2
74	-8.9	-6.8						74	-2.2	0.1
75	-9	-6.9						75	-2.3	0
76	-9	-6.9						76	-2.4	0
77	-9.1	-7						77	-2.5	-0.1
78	-9.2	-7.1						78	-2.6	-0.2
79	-9.1	-7.1						79	-2.7	-0.3
80	-9.2	-7.2						80	-2.8	-0.4
81	-9.4	-7.2						81	-2.9	-0.6
82	-9.3	-7.1						82	-3	-0.6
83	-9.3	-7.2						83	-3.1	-0.7
84	-9.4	-7.2						84	-3.2	-0.7
85	-9.4	-7.2						85	-3.3	-0.8
86	-9.4	-7.1						86	-3.4	-0.8
87	-9.4	-7.1						87	-3.5	-0.9
88	-9.2	-7						88	-3.5	-1
89	-9.2	-6.9						89	-3.8	-1.1
90	-9.1	-6.7						90	-3.8	-1.1
91	-8.9	-6.7						91	-3.8	-1.2
92	-8.8	-6.4						92	-3.9	-1.3
93	-8.6	-6.2						93	-4	-1.4
94	-8.5	-6.1						94	-4	-1.5
95	-8.3	-5.8						95	-4.1	-1.6
96	-8	-5.7						96	-4.2	-1.7
97	-7.7	-5.4						97	-4.3	-1.7
98	-7.5	-5.1						98	-4.3	-1.8
99	-7.2	-4.6						99	-4.3	-1.9
100	-6.7	-4.2						100	-4.4	-1.9
101	-6	-3.9						101	-4.5	-2
102	-5.2	-3.7						102	-4.5	-2
103	-4.8	-3.3						103	-4.6	-2.1
104	-4.2	-3						104	-4.7	-2.2
105	-3.6	-2.5						105	-4.7	-2.3
106	-2.9	-2.1						106	-4.8	-2.3
107	-2.3	-1.7						107	-4.8	-2.4
108	-1.9	-1.6						108	-4.8	-2.4
109	-1.5	-1.2						109	-4.9	-2.5
110	-1.2	-0.8						110	-5	-2.6
111	-0.7	-0.6						111	-5.1	-2.6
112	-0.3	-0.3						112	-5.1	-2.6
113	0.2	0						113	-5.1	-2.6
114	0.6	0.4						114	-5.2	-2.7
115	1.2	0.9						115	-5.2	-2.8
116	1.9	1.2						116	-5.2	-2.8
117	2.7	1.6						117	-5.3	-2.9
118	3.3	2						118	-5.4	-2.9
119	4.1	2.2						119	-5.4	-2.9
120	5.4	2.5						120	-5.5	-3
121	6.4	2.7						121	-5.5	-2.9
122	7	2.8						122	-5.5	-3
123	7.2	3.1						123	-5.6	-3.1
124	6.8	3.4						124	-5.7	-3.2
125	6.9	3.7						125	-5.6	-3.2
126	7.4	3.8						126	-5.7	-3.2
127	7.5	3.6						127	-5.7	-3.2
128	6.7	3.7						128	-5.8	-3.3
129	5.8	3.8						129	-5.9	-3.3
130	5.4	3.6						130	-5.8	-3.2
131	4.9	3.2						131	-5.8	-3.3
132	4.2	3						132	-5.9	-3.3
133	3.5	2.9						133	-5.8	-3.3
134	2.8	3						134	-5.8	-3.3
135	2.5	2.9						135	-5.9	-3.2
136	2.3	2.7						136	-5.9	-3.2
137	1.8	2.7						137	-5.9	-3.2
138	1.5	2.7						138	-5.6	-2.9
139	1.4	2.7						139	-5.1	-2.7
140	1.2	2.6						140	-4.5	-2.5
141	1.1	2.5						141	-3.9	-2.2
142	0.8	2.5						142	-3.2	-1.9
143	0.6	2.6						143	-1.9	-1.7
144	0.6	2.5						144	-1.4	-1.5
145	0.6	2.3						145	-0.8	-1.2
146	0.4	2.2						146	-0.2	-0.9
147	0.1	2						147	0.4	-0.6
148	0	2						148	0.9	-0.3
149	-0.1	2.3						149	1.3	0
150	-0.2	2.4						150	1.7	0.4
151	-0.2	2.4						151	2.1	0.6
152	-0.2	2.2						152	2.6	0.9
153	-0.3	2						153	3.1	1.2
154	-0.4	1.8						154	3.5	1.4
155	-0.5	1.6						155	3.9	1.9
156	-0.7	1.5						156	4.2	2.3
157	-0.8	1.4						157	4.6	2.5
158	-1.1	1.2						158	4.9	2.7
159	-1.2	1						159	5.3	3
160	-1.3	-0.2						160	5.5	3.2
161	-1.5	-0.4						161	5.9	3.4
162	-1.7	-0.5						162	6.1	3.6
163	-1.9	0						163	6.4	3.8
164	-2.1	0.2						164	6.5	4
165	-2.3	0.4						165	6.7	4.1
166	-2.4	0.6						166	6.7	4.2
167	-2.6	0.8						167	6.9	4.3
168	-2.7	-0.7						168	7	4.5
169	-2.8	-0.9						169	7	4.6
170	-2.9	-1						170	6.7	4.7
171	-3.1	-1.1						171	6	4.5
172	-3.2	-1.2						172	5.4	4.4
173	-3.3	-1.3						173	4.8	4.2
174	-3.4	-1.4						174	4.3	4.2
175	-3.5	-1.5						175	3.9	4
176	-3.6	-1.6						176	3.4	4
177	-3.7	-1.8						177	3.2	4
178	-3.8	-1.9						178	3	4
179	-3.9	-2						179	2.7	4
180	-4	-2						180	2.6	4
181	-4	-2.1						181	2.4	3.9
182	-4	-2.2						182	2.3	4
183	-4.1	-2.2						183	2.1	3.9
184	-4.1	-2.3						184	2	3.7
185	-4.2	-2.4						185	1.8	3.6
186	-4.3	-2.4						186	1.6	3.5
187	-4.4	-2.5						187	1.4	3.3
188	-4.5	-2.6						188	1.3	3.2
189	-4.6	-2.7						189	1.1	3.1
190	-4.7	-2.7						190	1.1	3
191	-4.7	-2.8						191	0.8	2.9
192	-4.8	-2.9						192	0.8	2.8
193	-4.9	-3						193	0.7	2.9
194	-5	-3						194	0.6	2.8
195	-5.1	-3.2						195	0.6	2.8
196	-5.3	-3.3						196	0.6	2.7
197	-5.3	-3.3						197	0.5	2.6
198	-5.4	-3.5						198	0.5	2.6
199	-5.6	-3.6						199	0.4	2.5
200	-5.7	-3.7						200	0.2	2.5
201	-5.8	-3.7						201	0.1	2.4
202	-5.7	-3.7						202	0	2.2
203	-5.8	-3.8						203	0	2.2
204	-5.9	-3.9						204	-0.1	2.2
205	-6	-3.9						205	-0.2	2
206	-6.1	-3.9						206	-0.4	1.9
207	-6	-4						207	-0.5	1.8
208	-6.1	-4.1						208	-0.6	1.7
209	-6.2	-4.1						209	-0.7	1.6
210	-6.3	-4.1						210	-0.8	1.6
211	-6.2	-4.2						211	-0.9	1.4
212	-6.3	-4.2						212	-1.1	1.3
213	-6.4	-4.3						213	-1.2	1.2
214	-6.4	-4.4						214	-1.3	1.1
215	-6.5	-4.4						215	-1.5	1
216	-6.4	-4.4						216	-1.5	0.9
217	-6.5	-4.5						217	-1.7	0.8
218	-6.6	-4.6						218	-1.7	0.7
219	-6.6	-4.6						219	-1.8	0.7
220	-6.7	-4.7						220	-1.9	0.4
221	-6.8	-4.7						221	-2	0.2
222	-6.8	-4.8						222	-2.1	0.1
223	-6.7	-4.8						223	-2.2	0
224	-6.8	-4.9						224	-2.3	-0.1
225	-6.9	-5						225	-2.4	-0.2
226	-7	-5						226	-2.5	-0.3
227	-7	-5.1						227	-2.6	-0.3
228	-7.1	-5.1						228	-2.7	-0.4
229	-7.2	-5.2						229	-2.7	-0.5
230	-7.1	-5.3						230	-2.8	-0.6
231	-7.1	-5.2						231	-2.9	-0.7
232	-7.2	-5.2						232	-3	-0.8
233	-7.2	-5.2						233	-3.1	-0.9
234	-7.2	-5.1						234	-3.2	-0.9
235	-7.2	-5.1						235	-3.3	-1
236	-7.2	-5.1						236	-3.4	-1.1
237	-7.1	-4.9						237	-3.6	-1.1
238	-7	-4.9						238	-3.7	-1.3
239	-7	-4.8						239	-3.8	-1.4
240	-6.8	-4.6						240	-3.8	-1.5
241	-6.7	-4.5						241	-3.9	-1.6
242	-6.5	-4.4						242	-4	-1.6
243	-6.2	-4						243	-4.1	-1.7
244	-5.8	-3.7						244	-4.2	-1.8
245	-5.3	-3.4						245	-4.3	-1.9
246	-4.7	-3.1						246	-4.4	-2
247	-4.1	-2.7						247	-4.5	-2.1
248	-3.4	-2.4						248	-4.5	-2.2
249	-2.7	-2.1						249	-4.6	-2.2
250	-2.1	-1.9						250	-4.6	-2.3
251	-1.5	-1.6						251	-4.7	-2.4
252	-1	-1.3						252	-4.8	-2.3
253	-0.5	-1						253	-4.8	-2.4
254	0.2	-0.8						254	-4.9	-2.5
255	0.9	-0.4						255	-5	-2.6
256	1.5	0.1						256	-5.1	-2.7
257	2.2	0.5						257	-5.1	-2.7
258	2.8	0.8						258	-5.2	-2.8
259	3.2	1.2						259	-5.3	-2.8
260	3.6	1.6						260	-5.4	-2.8
261	4.1	2						261	-5.3	-2.9
262	4.8	2.2						262	-5.4	-3
263	5.5	2.5						263	-5.5	-2.9
264	5.8	2.9						264	-5.5	-3
265	6.2	3.2						265	-5.5	-3.1
266	6.7	3.3						266	-5.6	-3.2
267	7.1	3.6						267	-5.7	-3.3
268	7.2	4.1						268	-5.7	-3.2
269	7.4	4.4						269	-5.8	-3.3
270	8.2	4.9						270	-5.8	-3.3
271	8.8	5.2						271	-5.8	-3.2
272	9.3	5.8						272	-5.8	-3.2
273	9.8	6.2						273	-5.8	-3.3
274	10.3	6.1						274	-5.8	-3.3
275	10.1	5.8						275	-5.8	-3.3
276	9.5	6						276	-5.8	-3.2
277	8.7	6.9						277	-5.8	-3.2
278	8.5	7.7						278	-5.8	-3.1
279	9.2	8.3						279	-5.6	-3
280	9.7	8.5						280	-5	-2.7
281	9.4	8.1						281	-4.5	-2.5
282	9.1	7.8						282	-3.9	-2.3
283	8.4	7.4						283	-3.1	-2.1
284	7.7	6.9						284	-2.5	-1.7
285	7	6.1						285	-1.8	-1.5
286	6.2	4.6						286	-1.2	-1.3
287	5.1	4						287	-0.6	-1
288	4.1	3.7						288	0	-0.7
289	3.2	3.6						289	0.7	-0.4
290	2.6	3.4						290	1.3	-0.2
291	2.2	3.3						291	1.8	0.1
292	1.9	2.9						292	2.4	0.4
293	1.4	1.7						293	3	0.7
294	1.1	0						294	3.4	0.9
295	0.3	-0.3						295	3.9	1.2
296	-0.5	-0.1						296	4.5	1.4
297	-1.2	-0.2						297	4.9	1.8
298	-1.6	-0.1						298	5.3	2.1
299	-1.8	0						299	5.7	2.3
300	-1.8	-0.1						300	6.1	2.5
301	-1.9	-0.1						301	6.5	2.8
302	-1.9	-0.1						302	6.9	3
303	-1.9	-0.3						303	7.2	3.2
304	-2.1	-0.4						304	7.5	3.4
305	-2.3	-0.7						305	7.7	3.6
306	-2.7	-0.9						306	8.1	3.8
307	-3	-1						307	8.4	4
308	-3.3	-1.1						308	8.6	4.2
309	-3.4	-1.2						309	8.7	4.3
310	-3.5	-1.2						310	8.8	4.4
311	-3.5	-1.3						311	8.7	4.5
312	-3.5	-1.4						312	8.4	4.4
313	-3.6	-1.5						313	7.7	4.3
314	-3.7	-1.6						314	6.8	4.1
315	-3.7	-1.8						315	6	4
316	-3.8	-1.9						316	5.3	3.9
317	-3.9	-2						317	4.7	3.6
318	-4	-2.1						318	4.1	3.5
319	-4.1	-2.2						319	3.5	3.4
320	-4.2	-2.3						320	3.1	3.2
321	-4.3	-2.3						321	2.8	3.1
322	-4.4	-2.4						322	2.4	3
323	-4.4	-2.5						323	2.1	2.8
324	-4.5	-2.4						324	1.8	2.7
325	-4.4	-2.5						325	1.6	2.6
326	-4.5	-2.5						326	1.3	2.4
327	-4.5	-2.6						327	1.1	2.3
328	-4.6	-2.6						328	0.9	2.2
329	-4.6	-2.6						329	0.6	2
330	-4.6	-2.7						330	0.5	1.9
331	-4.7	-2.7						331	0.3	1.8
332	-4.8	-2.8						332	0.1	1.7
333	-4.7	-2.9						333	-0.1	1.5
334	-4.7	-3						334	-0.3	1.4
335	-4.8	-3						335	-0.4	1.3
336	-4.8	-3						336	-0.6	1.1
337	-4.9	-3						337	-0.7	1
338	-4.9	-3						338	-0.9	1
339	-4.9	-3.1						339	-1	0.9
340	-4.9	-3.2						340	-1.1	0.6
341	-5	-3.1						341	-1.2	0.5
342	-5	-3.1						342	-1.4	0.5
343	-5	-3.2						343	-1.5	0.4
344	-5	-3.1						344	-1.6	0.3
345	-5	-3.2						345	-1.7	0.1
346	-5.1	-3.3						346	-1.8	0.1
347	-5.1	-3.3						347	-1.9	0
348	-5.2	-3.2						348	-2.1	-0.1
349	-5.2	-3.3						349	-2.2	-0.1
350	-5.2	-3.4						350	-2.2	-0.2
351	-5.3	-3.4						351	-2.3	-0.3
352	-5.3	-3.3						352	-2.4	-0.3
353	-5.3	-3.4						353	-2.5	-0.4
354	-5.3	-3.5						354	-2.5	-0.6
355	-5.3	-3.4						355	-2.6	-0.6
356	-5.4	-3.4						356	-2.7	-0.7
357	-5.4	-3.5						357	-2.7	-0.7
358	-5.4	-3.5						358	-2.7	-0.8
359	-5.4	-3.5						359	-2.8	-0.8
360	-5.4	-3.5						360	-2.9	-0.9
361	-5.4	-3.6						361	-3	-0.9
362	-5.3	-3.5						362	-3.1	-1
363	-5.4	-3.5						363	-3	-1
364	-5.4	-3.5						364	-3.1	-1.1
365	-5.4	-3.5						365	-3.1	-1.1
366	-5.3	-3.5						366	-3.2	-1.2
367	-5.4	-3.5						367	-3.2	-1.3
368	-5.4	-3.6						368	-3.3	-1.3
369	-5.5	-3.6						369	-3.5	-1.4
370	-5.4	-3.6						370	-3.5	-1.4
371	-5.4	-3.5						371	-3.6	-1.5
372	-5.4	-3.5						372	-3.7	-1.5
373	-5.4	-3.6						373	-3.8	-1.6
374	-5.4	-3.6						374	-3.8	-1.7
375	-5.4	-3.5						375	-3.9	-1.7
376	-5.4	-3.4						376	-3.9	-1.8
377	-5.3	-3.4						377	-4	-1.8
378	-5.2	-3.4						378	-4	-1.8
379	-5.2	-3.3						379	-4	-1.9
380	-5.1	-3.2						380	-4.1	-2
381	-4.9	-3.1						381	-4.2	-2
382	-4.9	-3.1						382	-4.2	-2.1
383	-4.8	-2.9						383	-4.3	-2.1
384	-4.7	-2.7						384	-4.4	-2.2
385	-4.5	-2.5						385	-4.3	-2.3
386	-4.3	-2.2						386	-4.4	-2.3
387	-4	-2						387	-4.5	-2.3
388	-3.8	-1.8						388	-4.5	-2.3
389	-3.5	-1.7						389	-4.6	-2.4
390	-3.3	-1.4						390	-4.6	-2.4
391	-3	-1.2						391	-4.7	-2.5
392	-2.8	-1						392	-4.8	-2.5
393	-2.5	-0.7						393	-4.8	-2.6
394	-2.1	-0.4						394	-4.8	-2.5
395	-1.7	0						395	-4.9	-2.6
396	-1.3	0.3						396	-4.9	-2.7
397	-1	0.6						397	-5	-2.7
398	-0.7	0.7						398	-5.1	-2.8
399	-0.4	1						399	-5	-2.8
400	-0.1	1.3						400	-5.1	-2.8
401	0.1	1.6						401	-5.2	-2.8
402	0.4	1.8						402	-5.2	-2.8
403	0.7	2.1						403	-5.3	-2.9
404	1	2.5						404	-5.3	-3
405	1.4	2.9						405	-5.3	-2.9
406	1.9	3.2						406	-5.3	-2.9
407	2.6	3.5						407	-5.4	-3
408	3.2	3.9						408	-5.5	-3.1
409	3.6	4.1						409	-5.4	-3.1
410	4.2	4.5						410	-5.5	-3.2
411	4.5	4.9						411	-5.5	-3.2
412	5.1	5.2						412	-5.6	-3.2
413	5.9	5.5						413	-5.7	-3.3
414	6.6	5.5						414	-5.6	-3.3
415	7	5.9						415	-5.6	-3.3
416	6.9	6.3						416	-5.6	-3.2
417	7.3	6.8						417	-5.6	-3.2
418	8	7.2						418	-5.5	-3.2
419	8.3	7.6						419	-5.5	-3.2
420	8.6	8						420	-5.5	-3.2
421	8.7	8.6						421	-5.5	-3
422	9	8.9						422	-5.3	-2.9
423	9.1	9.5						423	-4.8	-2.7
424	9.2	10.2						424	-4.1	-2.4
425	9.4	9.9						425	-3.4	-2.1
426	9.5	9.7						426	-2.7	-1.9
427	9.1	9.4						427	-1.8	-1.7
428	8.2	9.5						428	-1.1	-1.4
429	7.6	10						429	-0.4	-1.1
430	7.2	10.9						430	0.3	-0.8
431	7.2	11.5						431	0.9	-0.6
432	7.4	11.9						432	1.7	-0.4
433	7.5	12.6						433	2.2	-0.1
434	7.5	12.9						434	2.9	0.1
435	7.6	13.3						435	3.5	0.4
436	7.4	13.8						436	4.2	0.7
437	7.3	14.2						437	4.9	0.9
438	7.2	14.4						438	5.4	1.2
439	6.9	14.5						439	5.9	1.4
440	6.7	13						440	6.3	1.9
441	6.1	11.8						441	6.7	2.2
442	5.6	10.7						442	7.2	2.4
443	4.8	9.7						443	7.6	2.6
444	4.1	9						444	8	2.9
445	3.4	8.3						445	8.3	3.1
446	2.8	7.6						446	8.7	3.2
447	2.4	7.1						447	8.9	3.5
448	1.9	6.6						448	9.3	3.7
449	1.6	6.2						449	9.5	3.9
450	1.4	5.9						450	9.7	4.1
451	1.1	5.4						451	9.8	4.2
452	1	5						452	9.9	4.4
453	0.7	4.7						453	10	4.4
454	0.5	4.3						454	10	4.4
455	0.3	4						455	9.7	4.3
456	0.1	3.8						456	8.8	4.2
457	0	3.5						457	7.9	4.1
458	-0.3	3.2						458	7.1	3.9
459	-0.5	3						459	6.3	3.7
460	-0.7	2.7						460	5.6	3.7
461	-0.9	2.4						461	5	3.6
462	-1.2	1.8						462	4.5	3.5
463	-1.7	1.5						463	3.9	3.3
464	-2.2	1.1						464	3.5	3.1
465	-2.6	0.8						465	3.2	3.1
466	-2.9	0.6						466	2.8	3
467	-3.1	0.5						467	2.5	2.9
468	-3.3	0.5						468	2.3	2.7
469	-3.4	0.4						469	2	2.7
470	-3.6	0.3						470	1.8	2.6
471	-3.7	0.2						471	1.6	2.6
472	-3.7	0.1						472	1.4	2.4
473	-3.7	0						473	1.2	2.3
474	-3.8	-0.1						474	1.1	2.1
475	-3.8	-0.1						475	0.8	2.1
476	-3.7	-0.2						476	0.7	2
477	-3.7	-0.3						477	0.6	1.8
478	-3.7	-0.4						478	0.5	1.8
479	-3.7	-0.4						479	0.2	1.7
480	-3.7	-0.5						480	0.1	1.5
481	-3.7	-0.6						481	0	1.4
482	-3.7	-0.7						482	-0.2	1.3
483	-3.8	-0.8						483	-0.4	1.2
484	-3.8	-0.9						484	-0.6	1
485	-3.9	-1.1						485	-0.7	0.9
486	-3.9	-1						486	-0.8	0.8
487	-3.9	-0.9						487	-1	0.5
488	-3.9	-1.1						488	-1.1	0.4
489	-4	-1.2						489	-1.3	0.3
490	-4	-1.3						490	-1.4	0.2
491	-4.1	-1.3						491	-1.5	0.1
492	-4.1	-1.4						492	-1.8	0
493	-4.1	-1.4						493	-1.9	-0.2
494	-4.1	-1.5						494	-2	-0.2
495	-4.2	-1.6						495	-2.2	-0.3
496	-4.2	-1.7						496	-2.3	-0.4
497	-4.3	-1.6						497	-2.4	-0.5
498	-4.3	-1.7						498	-2.5	-0.6
499	-4.4	-1.7						499	-2.6	-0.7
500	-4.3	-1.8						500	-2.7	-0.8
501	-4.3	-1.8						501	-2.8	-0.8
502	-4.3	-1.8						502	-2.9	-1
503	-4.3	-1.9						503	-3	-1.1
504	-4.4	-1.9						504	-3.1	-1.2
505	-4.4	-1.9						505	-3.1	-1.3
506	-4.4	-2						506	-3.2	-1.4
507	-4.4	-2						507	-3.3	-1.4
508	-4.5	-2.1						508	-3.4	-1.5
509	-4.5	-2.1						509	-3.6	-1.6
510	-4.6	-2.2						510	-3.8	-1.7
511	-4.5	-2.2						511	-3.9	-1.7
512	-4.6	-2.2						512	-4	-1.8
513	-4.6	-2.2						513	-4.1	-1.9
514	-4.6	-2.3						514	-4.2	-1.9
515	-4.6	-2.3						515	-4.1	-2
516	-4.7	-2.3						516	-4.2	-2.1
517	-4.6	-2.4						517	-4.3	-2.2
518	-4.6	-2.4						518	-4.3	-2.2
519	-4.6	-2.3						519	-4.4	-2.3
520	-4.6	-2.3						520	-4.5	-2.4
521	-4.5	-2.3						521	-4.5	-2.5
522	-4.4	-2.2						522	-4.6	-2.4
523	-4.4	-2.1						523	-4.7	-2.5
524	-4.4	-1.9						524	-4.7	-2.6
525	-4.3	-1.9						525	-4.7	-2.6
526	-4.1	-1.8						526	-4.8	-2.7
527	-4	-1.7						527	-4.9	-2.7
528	-3.8	-1.4						528	-4.9	-2.8
529	-3.7	-1.3						529	-5	-2.9
530	-3.5	-1.1						530	-5.1	-2.9
531	-3.3	-0.9						531	-5	-3
532	-3	-0.6						532	-5.1	-3.1
533	-2.7	-0.4						533	-5.1	-3
534	-2.4	-0.2						534	-5.2	-3.1
535	-2.1	0.1						535	-5.3	-3.1
536	-1.8	0.5						536	-5.4	-3.2
537	-1.3	0.7						537	-5.4	-3.3
538	-1.1	1						538	-5.4	-3.3
539	-0.6	1.4						539	-5.4	-3.4
540	-0.1	1.6						540	-5.5	-3.4
541	0.5	1.9						541	-5.6	-3.4
542	0.8	2.2						542	-5.5	-3.5
543	1.1	2.5						543	-5.6	-3.5
544	1.4	2.8						544	-5.6	-3.6
545	1.8	3						545	-5.7	-3.6
546	2.3	3.1						546	-5.8	-3.7
547	2.6	3.2						547	-5.8	-3.7
548	2.7	3.4						548	-5.8	-3.8
549	2.6	3.5						549	-5.8	-3.8
550	2.6	3.7						550	-5.8	-3.9
551	2.6	3.9						551	-5.9	-3.8
552	2.7	4.2						552	-5.8	-3.7
553	2.9	4.5						553	-5.7	-3.7
554	3.3	5.1						554	-5.7	-3.7
555	3.9	5.4						555	-5.7	-3.5
556	4.8	5.6						556	-5.6	-3.5
557	5.5	6						557	-5.5	-3.4
558	6.1	6.1						558	-5.4	-3.4
559	6.7	6.4						559	-5.4	-3.3
560	6.8	6.4						560	-5.2	-3.1
561	7.1	6.6						561	-5.1	-3
562	7.2	6.8						562	-5	-2.9
563	7.3	7.3						563	-4.8	-2.8
564	7.1	8						564	-4.7	-2.6
565	7.8	8.6						565	-4.4	-2.5
566	8.7	9						566	-4.3	-2.3
567	9.2	9.3						567	-4.1	-2.2
568	9.6	9.8						568	-3.7	-2.1
569	10	10.3						569	-3.3	-1.8
570	10.1	10.8						570	-2.9	-1.5
571	10.1	11.4						571	-2	-1.3
572	10.1	11.9						572	-1.7	-1
573	10.3	12.4						573	-1.3	-0.7
574	10.3	13						574	-1.1	-0.5
575	10.3	13.2						575	-1.1	-0.5
576	10.3	13.6						576	-1	-0.2
577	9.8	14						577	-0.8	0
578	9.2	14.2						578	-0.4	0.3
579	8.9	14.6						579	0	0.6
580	8.6	13.5						580	0.4	0.8
581	8.1	12.4						581	0.8	1.2
582	7.5	11.6						582	1.1	1.4
583	6.8	10.7						583	1.4	1.8
584	6.1	10.1						584	1.4	1.8
585	5.6	9						585	1.4	1.9
586	4.9	8.3						586	1.6	2.2
587	3.8	7.5						587	2	2.5
588	2.7	7.1						588	2.2	2.8
589	2	6.7						589	2.8	3.2
590	1.6	6.3						590	3.3	3.3
591	1.3	5.9						591	3.6	3.5
592	1	5.4						592	3.8	3.7
593	0.7	4.8						593	4	3.8
594	0.3	4.5						594	4	3.9
595	-0.3	4						595	4	4
596	-0.6	3.6						596	3.9	4.1
597	-0.9	3.4						597	3.9	4.1
598	-1.1	3.1						598	3.8	4.1
599	-1.2	3						599	3.6	4.1
600	-1.4	2.8						600	3.4	4.2
601	-1.5	2.6						601	3.4	4.2
602	-1.6	2.4						602	3.3	4.3
603	-1.6	2.3						603	3.3	4.3
604	-1.7	2.1						604	3.2	4.3
605	-1.7	2						605	3.2	4.3
606	-1.8	1.9						606	3	4.3
607	-1.8	1.7						607	2.9	4.3
608	-1.9	1.5						608	2.8	4.3
609	-2	1.3						609	2.7	4.1
610	-2.2	1.3						610	2.5	4
611	-2.2	1.2						611	2.4	4
612	-2.2	1						612	2.2	3.9
613	-2.3	0.9						613	1.9	3.8
614	-2.4	0.7						614	1.8	3.7
615	-2.5	0.6						615	1.6	3.5
616	-2.5	0.5						616	1.4	3.4
617	-2.6	0.4						617	1.2	3.2
618	-2.7	0.4						618	1	3.1
619	-2.7	0.2						619	0.8	2.9
620	-2.8	0.1						620	0.6	2.9
621	-2.8	0.1						621	0.4	2.7
622	-2.9	0						622	0.3	2.7
623	-3	0						623	0.1	2.6
624	-3	-0.1						624	0.1	2.6
625	-3	-0.2						625	0	2.5
626	-3	-0.3						626	0	2.5
627	-3.1	-0.3						627	-0.1	2.5
628	-3.1	-0.4						628	-0.1	2.5
629	-3.2	-0.5						629	-0.1	2.5
630	-3.2	-0.6						630	-0.2	2.4
631	-3.3	-0.7						631	-0.2	2.3
632	-3.4	-0.7						632	-0.2	2.3
633	-3.4	-0.7						633	-0.2	2.3
634	-3.4	-0.8						634	-0.2	2.3
635	-3.5	-0.9						635	-0.2	2.3
636	-3.6	-1						636	-0.3	2.3
637	-3.6	-1.2						637	-0.3	2.1
638	-3.7	-1.2						638	-0.4	2.1
639	-3.8	-1.2						639	-0.5	2.1
640	-3.9	-1.3						640	-0.5	2.1
641	-4	-1.4						641	-0.5	2
642	-4	-1.5						642	-0.5	2
643	-4	-1.4						643	-0.6	2
644	-4	-1.5						644	-0.6	2
645	-4	-1.6						645	-0.6	1.9
646	-4.1	-1.6						646	-0.6	1.9
647	-4.2	-1.7						647	-0.7	1.9
648	-4.2	-1.6						648	-0.7	1.9
649	-4.2	-1.7						649	-0.7	1.8
650	-4.2	-1.8						650	-0.7	1.8
651	-4.3	-1.9						651	-0.8	1.8
652	-4.3	-1.8						652	-0.8	1.8
653	-4.3	-1.9						653	-0.8	1.8
654	-4.4	-2						654	-0.8	1.8
655	-4.4	-2.1						655	-0.9	1.8
656	-4.5	-2.1						656	-0.9	1.7
657	-4.6	-2.2						657	-0.9	1.7
658	-4.7	-2.2						658	-0.9	1.7
659	-4.7	-2.3						659	-0.9	1.6
660	-4.6	-2.2						660	-1	1.6
661	-4.7	-2.3						661	-1	1.6
662	-4.7	-2.3						662	-1	1.5
663	-4.7	-2.4						663	-1	1.5
664	-4.7	-2.3						664	-1.1	1.5
665	-4.6	-2.3						665	-1.1	1.5
666	-4.6	-2.3						666	-1.1	1.5
667	-4.5	-2.2						667	-1.1	1.5
668	-4.5	-2.1						668	-1.1	1.4
669	-4.5	-2.1						669	-1.1	1.4
670	-4.4	-2						670	-1.1	1.4
671	-4.3	-1.9						671	-1.2	1.4
672	-4.2	-1.7						672	-1.2	1.4
673	-4.1	-1.5						673	-1.2	1.4
674	-3.9	-1.3						674	-1.2	1.4
675	-3.6	-1						675	-1.2	1.4
676	-3.4	-0.9						676	-1.2	1.4
677	-3.1	-0.7						677	-1.3	1.4
678	-2.9	-0.5						678	-1.3	1.4
679	-2.6	-0.3						679	-1.3	1.4
680	-2.5	-0.1						680	-1.3	1.4
681	-2.2	0.1						681	-1.3	1.4
682	-2.1	0.4						682	-1.3	1.4
683	-1.8	0.5						683	-1.3	1.4
684	-1.6	0.8						684	-1.2	1.4
685	-1.4	1.1						685	-1.2	1.4
686	-1.2	1.4						686	-1.2	1.4
687	-0.9	1.7						687	-1.2	1.4
688	-0.4	2.1						688	-1.3	1.3
689	0.3	2.4						689	-1.4	1.3
690	1	2.9						690	-1.5	1.2
691	1.8	3.1						691	-1.5	1.1
692	2.6	3.3						692	-1.6	1.1
693	3.3	3.7						693	-1.6	1
694	4	4.1						694	-1.7	0.8
695	4.7	4.4						695	-1.7	0.8
696	5.5	4.8						696	-1.8	0.8
697	6.3	5						697	-1.8	0.8
698	7	5.3						698	-1.8	0.7
699	7.5	5.8						699	-1.9	0.7
700	8	6.1						700	-1.9	0.7
701	8.6	6.5						701	-1.9	0.7
702	8.9	6.6						702	-1.9	0.7
703	9	7.3						703	-2	0.7
704	9.3	7.8						704	-2	0.7
705	9.9	8.3						705	-2	0.7
706	10.2	8.6						706	-2	0.8
707	10.7	8.7						707	-2	0.8
708	10.9	9.3						708	-2	0.8
709	11.1	9.5						709	-2	0.8
710	11.3	10.2						710	-2	1
711	11.1	10.4						711	-1.9	1.2
712	11.1	10.2						712	-1.9	1.2
713	10.6	9.7						713	-1.9	1.3
714	10	10.6						714	-1.9	1.4
715	9.7	11.3						715	-1.9	1.4
716	9.7	11.8						716	-1.9	1.4
717	9.7	12.5						717	-1.9	1.4
718	9.7	12.7						718	-1.9	1.4
719	10	12.4						719	-1.9	1.3
720	9.7	12.5						720	-1.9	1.4
721	9.2	13.3						721	-1.9	1.4
722	8.9	12.9						722	-1.9	1.4
723	8.6	13.6						723	-1.9	1.4
724	8	14						724	-1.9	1.4
725	7.7	14						725	-1.9	1.4
726	7.4	13.9						726	-1.9	1.5
727	7	12.8						727	-1.9	1.6
728	6.5	11.6						728	-1.9	1.7
729	5.9	10.8						729	-1.9	1.8
730	5.3	9.9						730	-1.8	1.8
731	4.6	9.2						731	-1.8	1.9
732	4	8.5						732	-1.8	1.9
733	3.6	8.1						733	-1.8	1.8
734	3.1	7.5						734	-1.7	1.8
735	2.7	7.1						735	-1.7	1.7
736	2.4	6.8						736	-1.7	1.7
737	2.2	6.4						737	-1.7	1.7
738	2	6.2						738	-1.7	1.7
739	1.6	5.9						739	-1.7	1.6
740	1.4	5.6						740	-1.7	1.6
741	1.3	5.4						741	-1.6	1.7
742	1.1	5.1						742	-1.7	1.7
743	0.9	4.8						743	-1.7	1.7
744	0.8	4.4						744	-1.7	1.7
745	0.6	4.2						745	-1.7	1.7
746	0.5	3.9						746	-1.7	1.7
747	0.2	3.6						747	-1.8	1.7
748	0.1	3.4						748	-1.8	1.6
749	-0.1	3.2						749	-1.8	1.6
750	-0.2	3						750	-1.7	1.5
751	-0.3	2.8						751	-1.7	1.5
752	-0.4	2.6						752	-1.7	1.4
753	-0.5	2.3						753	-1.7	1.4
754	-0.7	2.2						754	-1.8	1.3
755	-0.8	2						755	-1.8	1.3
756	-0.9	1.9						756	-1.8	1.1
757	-1	1.8						757	-1.8	1.1
758	-1.1	1.6						758	-1.7	1.1
759	-1.2	1.5						759	-1.7	1
760	-1.3	1.3						760	-1.8	1.1
761	-1.4	1.2						761	-1.8	1.1
762	-1.5	1						762	-1.8	1.1
763	-1.6	0.9						763	-1.8	1.1
764	-1.7	0.8						764	-1.8	1.1
765	-1.8	0.7						765	-1.8	1.1
766	-1.9	0.6						766	-1.8	1.1
767	-1.9	0.5						767	-1.8	1
768	-2	0.4						768	-1.8	1
769	-2.1	0.3						769	-1.8	1
770	-2.1	0.3						770	-1.8	1
771	-2.2	0.3						771	-1.7	1
772	-2.3	0.2						772	-1.7	1
773	-2.3	0						773	-1.7	1
774	-2.4	-0.1						774	-1.7	1
775	-2.5	-0.2						775	-1.7	1
776	-2.6	-0.3						776	-1.7	0.9
777	-2.7	-0.4						777	-1.7	0.9
778	-2.8	-0.4						778	-1.7	0.9
779	-2.9	-0.5						779	-1.7	0.9
780	-3	-0.6						780	-1.7	1
781	-3.1	-0.7						781	-1.7	1
782	-3.2	-0.8						782	-1.7	1
783	-3.3	-0.9						783	-1.7	1
784	-3.4	-1						784	-1.7	1
785	-3.5	-1.1						785	-1.7	1
786	-3.4	-1.1						786	-1.7	1
787	-3.4	-1.1						787	-1.7	1
788	-3.5	-1.2						788	-1.7	0.9
789	-3.6	-1.3						789	-1.6	0.9
790	-3.6	-1.4						790	-1.6	0.9
791	-3.7	-1.4						791	-1.7	0.9
792	-3.8	-1.4						792	-1.7	1
793	-3.8	-1.5						793	-1.7	1
794	-3.9	-1.6						794	-1.7	1
795	-3.9	-1.7						795	-1.7	1
796	-3.9	-1.6						796	-1.7	1
797	-4	-1.7						797	-1.7	1
798	-4	-1.7						798	-1.7	1.1
799	-4.1	-1.8						799	-1.7	1.1
800	-4.1	-1.9						800	-1.7	1
801	-4.2	-2						801	-1.7	1
802	-4.1	-2.1						802	-1.7	0.9
803	-4.2	-2.1						803	-1.6	1
804	-4.2	-2						804	-1.6	0.9
805	-4.3	-2						805	-1.6	0.9
806	-4.3	-2						806	-1.6	1
807	-4.3	-2						807	-1.6	1
808	-4.1	-1.9						808	-1.6	1
809	-4.1	-1.8						809	-1.6	1
810	-4	-1.8						810	-1.6	1.1
811	-4	-1.7						811	-1.6	1.1
812	-3.9	-1.5						812	-1.5	1
813	-3.8	-1.4						813	-1.5	0.9
814	-3.6	-1.3						814	-1.5	0.8
815	-3.4	-1.3						815	-1.5	0.8
816	-3.3	-1.1						816	-1.4	0.9
817	-3	-0.8						817	-1.5	0.8
818	-2.8	-0.8						818	-1.5	0.9
819	-2.6	-0.6						819	-1.4	0.9
820	-2.4	-0.5						820	-1.5	0.8
821	-2	-0.3						821	-1.5	0.7
822	-1.6	0.1						822	-1.5	0.5
823	-1.3	0.3						823	-1.5	0.4
824	-1	0.6						824	-1.5	0.3
825	-0.7	1.1						825	-1.6	0.3
826	0	1.5						826	-1.6	0.2
827	0.9	1.8						827	-1.6	0.2
828	1.6	2						828	-1.8	0.1
829	2.1	2.4						829	-1.8	0.1
830	2.3	2.7						830	-1.8	0
831	2.6	3						831	-1.9	-0.1
832	3	3.3						832	-1.9	-0.2
833	3.4	3.5						833	-2	-0.2
834	3.9	3.8						834	-2	-0.3
835	4.4	4						835	-2.1	-0.3
836	5	4.3						836	-2.1	-0.4
837	5.6	4.3						837	-2.2	-0.4
838	6.3	4.7						838	-2.2	-0.4
839	6.7	5						839	-2.3	-0.4
840	7.5	5.4						840	-2.4	-0.4
841	8.5	5.6						841	-2.4	-0.4
842	9.1	5.9						842	-2.4	-0.4
843	9.4	6.2						843	-2.4	-0.4
844	10	6.6						844	-2.5	-0.3
845	10.6	7.1						845	-2.5	0
846	11.3	7.5						846	-2.5	0.3
847	11.6	7.8						847	-2.6	0.5
848	11.9	8.2						848	-2.6	0.7
849	12.5	8.4						849	-2.6	1
850	12.9	8.7						850	-2.6	1.2
851	13	9.3						851	-2.5	1.4
852	13.1	9.6						852	-2.3	1.6
853	13.3	10.2						853	-2.1	2
854	13.3	10.4						854	-1.7	2.1
855	13.2	11.1						855	-1.2	2.3
856	13	11.6						856	-0.8	2.4
857	12.7	11.9						857	-0.4	2.5
858	12.7	12.1						858	0.1	2.6
859	12.5	12.5						859	0.6	2.8
860	12.1	12.7						860	1.1	2.9
861	12.1	13.3						861	1.7	3.2
862	11.8	13.6						862	2.3	3.3
863	11.8	14						863	2.8	3.3
864	11.7	13.7						864	3.2	3.4
865	11.5	14.6						865	3.5	3.4
866	11	15.1						866	3.9	3.5
867	10.8	15.7						867	4.3	3.6
868	10.7	16.3						868	4.7	3.6
869	10.7	16.4						869	5	3.7
870	10.5	16.9						870	5.3	3.7
871	10.1	17.2						871	5.6	3.8
872	9.7	16.1						872	6	3.8
873	9.4	14.5						873	6.2	3.9
874	8.8	13.2						874	6.3	4
875	7.9	12.2						875	6.5	4.1
876	6.8	11.3						876	6.6	4.1
877	6.1	10.5						877	6.8	4
878	5.2	9.9						878	6.9	3.8
879	4.8	9.3						879	7	3.7
880	4.3	8.7						880	7	3.6
881	3.8	8.1						881	7	3.5
882	3.4	7.5						882	6.9	3.3
883	3	7						883	6.2	3.2
884	2.7	6.6						884	5.4	3.2
885	2.4	6.1						885	4.8	3.1
886	2	5.7						886	4.1	3
887	1.8	5.3						887	3.6	2.8
888	1.5	5						888	3.2	2.7
889	1.3	4.5						889	2.9	2.6
890	0.9	4.3						890	2.4	2.5
891	0.7	3.9						891	2.2	2.3
892	0.5	3.6						892	2	2.2
893	0.2	3.2						893	1.8	2.1
894	0.1	2.9						894	1.4	2
895	-0.2	2.7						895	1.3	1.8
896	-0.4	2.5						896	1.1	1.7
897	-0.5	2.2						897	0.9	1.6
898	-0.6	2						898	0.7	1.4
899	-0.9	1.9						899	0.5	1.2
900	-1	1.6						900	0.2	1.2
901	-1.1	1.4						901	0.1	1
902	-1.4	1.2						902	0	0.9
903	-1.5	1						903	-0.2	0.8
904	-1.6	0.9						904	-0.4	0.8
905	-1.7	0.7						905	-0.5	0.6
906	-1.8	0.6						906	-0.6	0.5
907	-2	0.5						907	-0.8	0.4
908	-2	0.5						908	-0.8	0.4
909	-2.1	0.5						909	-0.9	0.3
910	-2.1	0.5						910	-1	0.1
911	-2.1	0.4						911	-1.2	0
912	-2.2	0.3						912	-1.4	0
913	-2.2	0.3						913	-1.5	-0.1
914	-2.2	0.2						914	-1.5	-0.2
915	-2.3	0.1						915	-1.7	-0.3
916	-2.3	0						916	-1.9	-0.4
917	-2.4	0						917	-1.9	-0.5
918	-2.4	-0.1						918	-2	-0.6
919	-2.5	-0.1						919	-2.1	-0.7
920	-2.5	-0.2						920	-2.2	-0.7
921	-2.6	-0.3						921	-2.2	-0.8
922	-2.6	-0.3						922	-2.3	-0.9
923	-2.7	-0.4						923	-2.6	-1
924	-2.7	-0.4						924	-2.7	-1.1
925	-2.7	-0.5						925	-2.7	-1.2
926	-2.7	-0.4						926	-2.8	-1.3
927	-2.7	-0.5						927	-2.9	-1.4
928	-2.8	-0.6						928	-3	-1.5
929	-2.9	-0.7						929	-3.1	-1.6
930	-2.9	-0.7						930	-3.2	-1.7
931	-3	-0.8						931	-3.3	-1.8
932	-3.1	-0.8						932	-3.4	-1.9
933	-3.1	-0.9						933	-3.5	-2
934	-3.2	-1						934	-3.6	-2
935	-3.2	-1.1						935	-3.7	-2.1
936	-3.3	-1.2						936	-3.8	-2.2
937	-3.4	-1.2						937	-3.9	-2.2
938	-3.5	-1.3						938	-4	-2.3
939	-3.6	-1.4						939	-4.1	-2.4
940	-3.7	-1.4						940	-4.2	-2.4
941	-3.8	-1.5						941	-4.3	-2.5
942	-3.8	-1.5						942	-4.3	-2.6
943	-3.7	-1.5						943	-4.3	-2.7
944	-3.8	-1.6						944	-4.4	-2.8
945	-3.9	-1.7						945	-4.5	-2.9
946	-4	-1.8						946	-4.5	-2.9
947	-4.1	-1.8						947	-4.6	-2.9
948	-4.2	-1.9						948	-4.7	-3
949	-4.2	-1.9						949	-4.8	-3.1
950	-4.2	-2						950	-4.9	-3.2
951	-4.2	-2						951	-4.9	-3.3
952	-4.2	-1.9						952	-5	-3.4
953	-4.2	-1.9						953	-5.1	-3.4
954	-4.2	-1.8						954	-5.1	-3.5
955	-4.1	-1.7						955	-5.2	-3.6
956	-3.9	-1.5						956	-5.3	-3.6
957	-3.8	-1.4						957	-5.3	-3.6
958	-3.7	-1.3						958	-5.4	-3.7
959	-3.5	-1.1						959	-5.5	-3.8
960	-3.4	-1						960	-5.5	-3.8
961	-3.2	-0.8						961	-5.6	-3.9
962	-2.9	-0.6						962	-5.7	-3.9
963	-2.6	-0.5						963	-5.6	-4
964	-2.3	-0.2						964	-5.7	-4
965	-1.8	0.2						965	-5.8	-4.1
966	-1.3	0.6						966	-5.9	-4.2
967	-0.6	1						967	-6	-4.2
968	0.2	1.4						968	-5.9	-4.3
969	0.9	1.6						969	-6	-4.4
970	1.7	1.7						970	-6.1	-4.4
971	2.3	1.7						971	-6.1	-4.5
972	2.7	1.8						972	-6.2	-4.5
973	3.2	1.9						973	-6.3	-4.6
974	3.3	2						974	-6.2	-4.6
975	3.7	2.2						975	-6.3	-4.6
976	4.2	2.6						976	-6.4	-4.7
977	4.8	2.6						977	-6.4	-4.7
978	5.3	2.8						978	-6.4	-4.7
979	5.9	3						979	-6.5	-4.7
980	6.5	3.2						980	-6.5	-4.7
981	7.1	3.5						981	-6.6	-4.7
982	7.6	3.7						982	-6.6	-4.6
983	8.1	4						983	-6.6	-4.5
984	8.6	4.3						984	-6.7	-4.5
985	9	4.4						985	-6.7	-4.4
986	9.3	4.8						986	-6.6	-4.1
987	9.7	5.2						987	-6.7	-3.8
988	10	5.6						988	-6.7	-3.6
989	10.4	5.9						989	-6.7	-3.3
990	10.6	6.3						990	-6.7	-3
991	11.1	6.8						991	-6.6	-2.8
992	11.6	7.1						992	-6.4	-2.5
993	11.8	7.5						993	-6	-2.3
994	12	8.1						994	-5.4	-2
995	11.9	8.6						995	-4.5	-1.7
996	12.1	9.2						996	-3.7	-1.3
997	12.1	9.9						997	-2.9	-1
998	12.2	10.6						998	-2.1	-0.8
999	12.7	11						999	-0.8	-0.5
1000	13.1	10.2						1000	-0.2	-0.2
1001	13.2	9.6						1001	0.5	0
1002	12.3	8.8						1002	1.4	0.2
1003	11.4	7.9						1003	2.1	0.6
1004	9.9	7.3						1004	2.7	0.8
1005	8.3	6.4						1005	3.3	1
1006	6.9	4.1						1006	3.8	1.3
1007	5.5	4.7						1007	4.2	1.5
1008	4.5	5.5						1008	4.6	1.7
1009	3.9	6.2						1009	5.1	1.9
1010	3.8	7						1010	5.7	2.3
1011	3.7	7						1011	6	2.7
1012	3.6	6.4						1012	6.2	2.8
1013	3.5	6						1013	6.5	3
1014	3.1	6.5						1014	6.8	3.3
1015	2.7	6.5						1015	7.1	3.5
1016	2.7	6						1016	7.3	3.6
1017	2.6	5.7						1017	7.4	3.7
1018	2.5	5.3						1018	7.7	3.6
1019	2.1	5.1						1019	8	3.5
1020	2	4.9						1020	8.2	3.4
1021	1.7	4.8						1021	8.1	3.3
1022	1.7	4.4						1022	8	3.3
1023	1.5	4.2						1023	7.8	3.2
1024	1.2	3.9						1024	7.4	3.1
1025	1.1	3.7						1025	6.6	3.1
1026	0.9	3.4						1026	5.8	3.1
1027	0.6	3.2						1027	5	3
1028	0.4	2.8						1028	4.4	3
1029	0.2	2.5						1029	3.8	3
1030	0	2.2						1030	3.4	2.9
1031	-0.2	2						1031	3	2.9
1032	-0.4	1.8						1032	2.7	2.7
1033	-0.7	1.5						1033	2.5	2.7
1034	-1	1.3						1034	2.3	2.6
1035	-1.2	1.1						1035	2	2.4
1036	-1.4	1						1036	1.8	2.3
1037	-1.5	0.8						1037	1.6	2.2
1038	-1.6	0.5						1038	1.4	2.2
1039	-1.8	0.4						1039	1.3	2.1
1040	-2	0.3						1040	1.2	2
1041	-2.1	0.1						1041	1	1.9
1042	-2.2	0						1042	0.9	1.8
1043	-2.3	-0.2						1043	0.7	1.8
1044	-2.4	-0.3						1044	0.7	1.6
1045	-2.5	-0.4						1045	0.4	1.6
1046	-2.6	-0.6						1046	0.4	1.5
1047	-2.8	-0.7						1047	0.3	1.3
1048	-2.9	-0.8						1048	0.1	1.3
1049	-3	-1						1049	0	1.2
1050	-3.2	-1.1						1050	-0.1	1.1
1051	-3.3	-1.3						1051	-0.2	1
1052	-3.4	-1.5						1052	-0.3	0.9
1053	-3.6	-1.5						1053	-0.4	0.8
1054	-3.8	-1.7						1054	-0.5	0.5
1055	-3.9	-1.8						1055	-0.6	0.4
1056	-4	-1.9						1056	-0.8	0.3
1057	-4.1	-2						1057	-0.9	0.2
1058	-4.1	-2.2						1058	-1	0
1059	-4.2	-2.2						1059	-1	-0.1
1060	-4.4	-2.3						1060	-1.2	-0.2
1061	-4.5	-2.5						1061	-1.4	-0.3
1062	-4.6	-2.6						1062	-1.5	-0.4
1063	-4.7	-2.8						1063	-1.6	-0.5
1064	-4.8	-2.9						1064	-1.8	-0.6
1065	-5	-3						1065	-1.9	-0.7
1066	-5	-3.1						1066	-2.3	-0.9
1067	-5.2	-3.3						1067	-2.4	-0.9
1068	-5.3	-3.4						1068	-2.5	-1
1069	-5.4	-3.4						1069	-2.6	-1.1
1070	-5.5	-3.6						1070	-2.7	-1.2
1071	-5.6	-3.7						1071	-2.8	-1.2
1072	-5.6	-3.8						1072	-2.9	-1.3
1073	-5.7	-3.8						1073	-3.1	-1.4
1074	-5.8	-4						1074	-3.2	-1.5
1075	-6	-4						1075	-3.3	-1.5
1076	-6.1	-4						1076	-3.4	-1.6
1077	-6	-4.1						1077	-3.5	-1.7
1078	-6.1	-4.3						1078	-3.6	-1.8
1079	-6.2	-4.3						1079	-3.7	-1.8
1080	-6.3	-4.4						1080	-3.8	-1.9
1081	-6.4	-4.5						1081	-3.8	-2
1082	-6.4	-4.7						1082	-3.9	-2
1083	-6.5	-4.6						1083	-4	-2.1
1084	-6.7	-4.7						1084	-4.1	-2.2
1085	-6.7	-4.8						1085	-4.1	-2.2
1086	-6.7	-4.8						1086	-4.2	-2.3
1087	-6.8	-4.9						1087	-4.3	-2.4
1088	-7	-5.1						1088	-4.3	-2.4
1089	-7	-5						1089	-4.4	-2.5
1090	-7	-5.1						1090	-4.5	-2.6
1091	-7	-5.1						1091	-4.5	-2.6
1092	-7.1	-5.1						1092	-4.6	-2.7
1093	-7.1	-5.2						1093	-4.6	-2.7
1094	-7.2	-5.1						1094	-4.6	-2.7
1095	-7.2	-5.2						1095	-4.7	-2.8
1096	-7.2	-5.2						1096	-4.8	-2.9
1097	-7.1	-5.1						1097	-4.8	-2.9
1098	-7.2	-5.1						1098	-4.9	-3
1099	-7.2	-5.1						1099	-5	-3.1
1100	-7.1	-5						1100	-5	-3.1
1101	-7.1	-5						1101	-5	-3.2
1102	-7.1	-4.9						1102	-5.1	-3.2
1103	-7	-4.9						1103	-5.1	-3.2
1104	-6.9	-4.8						1104	-5.2	-3.2
1105	-6.9	-4.6						1105	-5.3	-3.3
1106	-6.9	-4.5						1106	-5.3	-3.4
1107	-6.7	-4.4						1107	-5.4	-3.4
1108	-6.5	-4						1108	-5.5	-3.3
1109	-6	-3.8						1109	-5.5	-3.3
1110	-5.1	-3.5						1110	-5.5	-3.4
1111	-4.3	-3.1						1111	-5.6	-3.4
1112	-3.4	-2.8						1112	-5.6	-3.5
1113	-2.6	-2.5						1113	-5.7	-3.5
1114	-1.6	-2.2						1114	-5.6	-3.5
1115	-1	-1.8						1115	-5.7	-3.6
1116	-0.3	-1.4						1116	-5.7	-3.6
1117	0.5	-1.2						1117	-5.8	-3.7
1118	1.2	-0.8						1118	-5.8	-3.6
1119	2	-0.5						1119	-5.9	-3.7
1120	2.6	-0.1						1120	-5.9	-3.7
1121	3.3	0.2						1121	-5.9	-3.7
1122	3.8	0.6						1122	-6	-3.6
1123	4.5	0.9						1123	-6	-3.5
1124	5	1.2						1124	-6.1	-3.4
1125	5.6	1.5						1125	-6.1	-3.4
1126	6	1.8						1126	-6.1	-3.3
1127	6.6	2.1						1127	-6.1	-3
1128	6.9	2.5						1128	-6.1	-2.8
1129	7.5	2.9						1129	-6.1	-2.6
1130	8.1	3.3						1130	-6.1	-2.4
1131	8.7	3.7						1131	-6.1	-2
1132	9.2	4.1						1132	-6	-1.8
1133	9.5	4.6						1133	-6	-1.6
1134	9.7	5.1						1134	-5.8	-1.3
1135	10.3	5.5						1135	-5.4	-1.1
1136	10.7	6						1136	-4.8	-0.8
1137	11.4	6.7						1137	-4.1	-0.6
1138	11.7	7.1						1138	-3.4	-0.3
1139	12	7.2						1139	-2.6	-0.1
1140	12.2	7.7						1140	-1.8	0.2
1141	12	8.4						1141	-1.1	0.5
1142	11.9	9.1						1142	-0.4	0.7
1143	12	9.1						1143	0.2	0.9
1144	12.3	8.8						1144	0.7	1.3
1145	11.9	8.2						1145	1.3	1.5
1146	10.9	8.1						1146	2.1	1.7
1147	10	7.7						1147	2.8	2
1148	9.2	7.4						1148	3.4	2.2
1149	8.4	7.2						1149	4	2.4
1150	7.6	7.2						1150	4.7	2.7
1151	7.1	6.9						1151	5.3	2.9
1152	6.6	6.6						1152	5.8	3.2
1153	6.1	6.4						1153	6.3	3.3
1154	5.7	6.3						1154	6.7	3.5
1155	5.3	6						1155	7.2	3.7
1156	5	6						1156	7.5	3.8
1157	4.7	5.9						1157	7.8	3.9
1158	4.5	5.8						1158	8.2	4.1
1159	4.2	5.7						1159	8.4	4.2
1160	4	5.7						1160	8.7	4
1161	3.7	5.5						1161	9	3.9
1162	3.5	5.3						1162	9.1	3.8
1163	3.4	5.2						1163	9.4	3.7
1164	3.2	5						1164	9.4	3.5
1165	2.9	4.7						1165	9.6	3.4
1166	2.8	4.6						1166	9.6	3.3
1167	2.5	4.2						1167	9.4	3.3
1168	2.4	4.1						1168	8.6	3.2
1169	2	3.9						1169	7.7	3.1
1170	1.9	3.7						1170	6.8	3
1171	1.8	3.5						1171	6.1	3
1172	1.7	3.4						1172	5.4	2.8
1173	1.3	3.1						1173	4.9	2.8
1174	1.2	3						1174	4.4	2.8
1175	1.1	2.7						1175	3.9	2.6
1176	0.8	2.4						1176	3.5	2.5
1177	0.6	2.3						1177	3.1	2.5
1178	0.4	2.1						1178	2.9	2.4
1179	0.1	1.8						1179	2.7	2.2
1180	-0.1	1.6						1180	2.4	2.1
1181	-0.3	1.5						1181	2.2	2
1182	-0.6	1.3						1182	1.9	1.8
1183	-0.7	1.2						1183	1.8	1.8
1184	-0.9	1						1184	1.6	1.7
1185	-1.1	0.7						1185	1.5	1.5
1186	-1.2	0.5						1186	1.3	1.5
1187	-1.4	0.4						1187	1.1	1.4
1188	-1.6	0.2						1188	0.9	1.3
1189	-1.8	0.1						1189	0.8	1.2
1190	-2	-0.2						1190	0.6	1.1
1191	-2.1	-0.3						1191	0.4	1
1192	-2.2	-0.4						1192	0.3	0.9
1193	-2.4	-0.5						1193	0.2	0.9
1194	-2.5	-0.7						1194	0.1	0.7
1195	-2.6	-0.8						1195	-0.1	0.6
1196	-2.8	-1						1196	-0.2	0.5
1197	-2.9	-1.2						1197	-0.4	0.5
1198	-3	-1.2						1198	-0.5	0.4
1199	-3.2	-1.3						1199	-0.6	0.3
1200	-3.3	-1.5						1200	-0.7	0.2
1201	-3.4	-1.6						1201	-0.9	0.2
1202	-3.5	-1.7						1202	-1	-0.1
1203	-3.6	-1.8						1203	-1.1	-0.2
1204	-3.7	-2						1204	-1.2	-0.3
1205	-3.8	-2.1						1205	-1.3	-0.4
1206	-4	-2.2						1206	-1.5	-0.4
1207	-4.1	-2.3						1207	-1.6	-0.5
1208	-4.2	-2.4						1208	-1.7	-0.6
1209	-4.3	-2.4						1209	-1.8	-0.6
1210	-4.4	-2.5						1210	-2	-0.7
1211	-4.5	-2.6						1211	-2.2	-0.8
1212	-4.6	-2.7						1212	-2.3	-0.8
1213	-4.6	-2.9						1213	-2.4	-0.9
1214	-4.7	-3						1214	-2.5	-1
1215	-4.8	-3						1215	-2.5	-1.2
1216	-4.9	-3.1						1216	-2.6	-1.2
1217	-5	-3.2						1217	-2.7	-1.3
1218	-5.1	-3.4						1218	-2.8	-1.3
1219	-5.2	-3.5						1219	-2.9	-1.3
1220	-5.2	-3.6						1220	-3	-1.4
1221	-5.3	-3.7						1221	-3.2	-1.4
1222	-5.4	-3.8						1222	-3.2	-1.5
1223	-5.5	-3.8						1223	-3.3	-1.6
1224	-5.6	-3.8						1224	-3.4	-1.6
1225	-5.6	-3.8						1225	-3.4	-1.7
1226	-5.6	-3.9						1226	-3.5	-1.7
1227	-5.6	-3.8						1227	-3.6	-1.8
1228	-5.5	-3.8						1228	-3.7	-1.8
1229	-5.5	-3.9						1229	-3.7	-1.9
1230	-5.5	-3.9						1230	-3.8	-2
1231	-5.4	-3.9						1231	-3.9	-2
1232	-5.4	-3.8						1232	-4	-2.1
1233	-5.4	-3.8						1233	-4	-2.1
1234	-5.4	-3.8						1234	-4.1	-2
1235	-5.3	-3.7						1235	-4.1	-2
1236	-5.3	-3.7						1236	-4.2	-2.1
1237	-5.3	-3.7						1237	-4.3	-2.1
1238	-5.3	-3.5						1238	-4.2	-2.2
1239	-5.2	-3.5						1239	-4.3	-2.2
1240	-5.1	-3.4						1240	-4.4	-2.3
1241	-5	-3.3						1241	-4.4	-2.4
1242	-4.9	-3.1						1242	-4.5	-2.3
1243	-4.7	-3						1243	-4.5	-2.4
1244	-4.5	-2.9						1244	-4.6	-2.4
1245	-4.4	-2.7						1245	-4.6	-2.5
1246	-4.2	-2.5						1246	-4.7	-2.5
1247	-4	-2.4						1247	-4.7	-2.6
1248	-3.7	-2.2						1248	-4.8	-2.6
1249	-3.5	-2						1249	-4.9	-2.6
1250	-3.2	-1.8						1250	-4.8	-2.7
1251	-2.9	-1.6						1251	-4.9	-2.7
1252	-2.6	-1.4						1252	-4.9	-2.8
1253	-2.1	-1.1						1253	-5	-2.9
1254	-1.5	-0.6						1254	-5	-2.8
1255	-0.5	-0.2						1255	-5.1	-2.9
1256	0.3	0						1256	-5.1	-2.9
1257	0.9	0.2						1257	-5.1	-3
1258	1.2	0.7						1258	-5.2	-3
1259	1.6	1						1259	-5.2	-2.9
1260	2.2	1.4						1260	-5.3	-3
1261	2.9	1.6						1261	-5.3	-3
1262	3.5	1.8						1262	-5.4	-3
1263	3.7	2.1						1263	-5.4	-3
1264	4.1	2.5						1264	-5.4	-2.9
1265	4.7	2.7						1265	-5.5	-2.9
1266	5.5	2.9						1266	-5.5	-2.8
1267	5.8	2.9						1267	-5.6	-2.8
1268	6	3.3						1268	-5.6	-2.6
1269	6.3	3.6						1269	-5.6	-2.4
1270	7	4						1270	-5.6	-2.2
1271	7.8	4.2						1271	-5.6	-1.9
1272	8.5	4.6						1272	-5.6	-1.7
1273	9.2	5						1273	-5.5	-1.5
1274	9.6	5.4						1274	-5.5	-1.1
1275	10.1	5.9						1275	-5.5	-0.9
1276	10.9	6						1276	-5.5	-0.7
1277	11.3	6.1						1277	-5.4	-0.4
1278	11.1	6.3						1278	-4.9	-0.2
1279	10.7	6.7						1279	-4.3	0
1280	10.4	7.1						1280	-3.6	0.4
1281	10.6	7.3						1281	-2.9	0.6
1282	10.6	7.5						1282	-2.2	0.9
1283	10.6	8.3						1283	-0.5	1.1
1284	10.5	8.6						1284	0.2	1.3
1285	10.7	8.8						1285	0.9	1.6
1286	10.5	8.9						1286	1.6	1.8
1287	10.1	8.9						1287	2.3	2
1288	9.7	8.7						1288	3	2.2
1289	9.3	8.2						1289	3.6	2.4
1290	8.8	7.5						1290	4.2	2.7
1291	7.9	7.1						1291	4.7	3
1292	7	6.6						1292	5.3	3.2
1293	6.1	6.1						1293	5.8	3.4
1294	5.5	5.9						1294	6.3	3.6
1295	4.6	5.6						1295	6.8	3.8
1296	3.9	5.5						1296	7.4	3.8
1297	3.7	5.3						1297	7.8	4
1298	3.4	5.1						1298	8.1	4.1
1299	3.3	5						1299	8.5	4.2
1300	3.2	4.9						1300	8.8	4.2
1301	3.1	4.9						1301	9.1	4
1302	3	4.8						1302	9.3	4
1303	2.8	4.5						1303	9.5	3.9
1304	2.7	4.4						1304	9.7	3.9
1305	2.6	4.3						1305	9.7	3.7
1306	2.3	4.3						1306	9.8	3.7
1307	2.2	4						1307	9.8	3.6
1308	2.1	3.7						1308	9.8	3.6
1309	1.8	3.4						1309	9.5	3.5
1310	1.6	3.3						1310	8.7	3.4
1311	1.2	3						1311	7.9	3.4
1312	1	2.8						1312	7.1	3.2
1313	0.8	2.6						1313	6.4	3.2
1314	0.6	2.4						1314	5.7	3.1
1315	0.5	2.2						1315	5.3	2.9
1316	0.2	1.9						1316	4.9	2.8
1317	-0.2	1.6						1317	4.5	2.7
1318	-0.8	1.3						1318	4.2	2.6
1319	-1.1	1.2						1319	3.9	2.5
1320	-1.3	1						1320	3.6	2.2
1321	-1.4	0.9						1321	3.4	2.1
1322	-1.4	0.7						1322	3.2	2
1323	-1.6	0.5						1323	2.9	1.7
1324	-1.7	0.4						1324	2.7	1.6
1325	-1.8	0.3						1325	2.5	1.6
1326	-1.9	0.2						1326	2.2	1.5
1327	-1.9	0.1						1327	2	1.4
1328	-2.1	0						1328	1.7	1.2
1329	-2.2	-0.2						1329	1.6	1.2
1330	-2.3	-0.3						1330	1.4	1.1
1331	-2.4	-0.5						1331	1.2	1
1332	-2.5	-0.6						1332	1	0.9
1333	-2.6	-0.7						1333	0.8	0.8
1334	-2.7	-0.8						1334	0.7	0.7
1335	-2.8	-0.9						1335	0.5	0.6
1336	-2.9	-1						1336	0.4	0.4
1337	-2.9	-1						1337	0.2	0.3
1338	-3	-1						1338	0.1	0.2
1339	-3	-1.1						1339	0	0.1
1340	-3	-1.2						1340	-0.3	0.1
1341	-3.1	-1.3						1341	-0.4	0
1342	-3.1	-1.4						1342	-0.5	-0.1
1343	-3.2	-1.4						1343	-0.7	-0.2
1344	-3.3	-1.5						1344	-0.9	-0.3
1345	-3.3	-1.6						1345	-1	-0.3
1346	-3.4	-1.6						1346	-1.1	-0.4
1347	-3.4	-1.6						1347	-1.3	-0.5
1348	-3.5	-1.7						1348	-1.4	-0.6
1349	-3.5	-1.8						1349	-1.5	-0.7
1350	-3.6	-1.9						1350	-1.6	-0.7
1351	-3.6	-1.9						1351	-1.8	-0.8
1352	-3.6	-1.9						1352	-2	-0.9
1353	-3.7	-2						1353	-2.2	-1
1354	-3.7	-2.1						1354	-2.3	-1.1
1355	-3.8	-2.1						1355	-2.4	-1.1
1356	-3.8	-2.2						1356	-2.6	-1.2
1357	-3.9	-2.2						1357	-2.7	-1.3
1358	-3.9	-2.1						1358	-2.7	-1.4
1359	-3.9	-2.2						1359	-2.8	-1.4
1360	-3.9	-2.3						1360	-2.9	-1.5
1361	-4	-2.3						1361	-3	-1.6
1362	-4	-2.3						1362	-3	-1.7
1363	-4.1	-2.4						1363	-3.1	-1.6
1364	-4.1	-2.4						1364	-3.2	-1.7
1365	-4.2	-2.5						1365	-3.3	-1.8
1366	-4.2	-2.6						1366	-3.4	-1.9
1367	-4.2	-2.5						1367	-3.6	-1.9
1368	-4.3	-2.6						1368	-3.6	-2
1369	-4.3	-2.7						1369	-3.7	-2.1
1370	-4.3	-2.7						1370	-3.8	-2.1
1371	-4.4	-2.7						1371	-3.9	-2.2
1372	-4.3	-2.7						1372	-4	-2.3
1373	-4.4	-2.7						1373	-4	-2.3
1374	-4.4	-2.7						1374	-4.1	-2.4
1375	-4.5	-2.8						1375	-4.2	-2.4
1376	-4.5	-2.7						1376	-4.3	-2.5
1377	-4.4	-2.8						1377	-4.3	-2.6
1378	-4.4	-2.9						1378	-4.4	-2.6
1379	-4.4	-2.9						1379	-4.5	-2.6
1380	-4.5	-2.9						1380	-4.6	-2.7
1381	-4.5	-2.9						1381	-4.6	-2.7
1382	-4.6	-3						1382	-4.7	-2.8
1383	-4.5	-3.1						1383	-4.7	-2.8
1384	-4.6	-2.9						1384	-4.8	-2.7
1385	-4.7	-2.9						1385	-4.9	-2.8
1386	-4.7	-2.8						1386	-5	-2.9
1387	-4.7	-2.8						1387	-5	-2.9
1388	-4.5	-2.7						1388	-5.1	-3
1389	-4.4	-2.6						1389	-5.2	-2.9
1390	-4.3	-2.5						1390	-5.3	-3
1391	-4.2	-2.3						1391	-5.3	-3.1
1392	-4.1	-2.2						1392	-5.4	-3.1
1393	-3.9	-2.1						1393	-5.4	-3.1
1394	-3.7	-1.8						1394	-5.4	-3.2
1395	-3.5	-1.6						1395	-5.5	-3.2
1396	-3.2	-1.3						1396	-5.6	-3.3
1397	-2.9	-1						1397	-5.6	-3.3
1398	-2.4	-0.6						1398	-5.7	-3.4
1399	-1.8	-0.4						1399	-5.6	-3.4
1400	-1	-0.1						1400	-5.7	-3.5
1401	-0.4	0.2						1401	-5.8	-3.4
1402	0.1	0.7						1402	-5.8	-3.5
1403	0.7	1						1403	-5.9	-3.5
1404	1.3	1.2						1404	-6	-3.5
1405	1.9	1.5						1405	-6	-3.5
1406	2.2	1.6						1406	-6	-3.4
1407	2.5	1.9						1407	-6.1	-3.4
1408	2.6	2.3						1408	-6.1	-3.4
1409	3.1	2.6						1409	-6.2	-3.3
1410	4	2.9						1410	-6.1	-3.1
1411	4.9	3.1						1411	-6.2	-2.9
1412	5.3	3.4						1412	-6.2	-2.7
1413	5.8	3.8						1413	-6.2	-2.4
1414	6.3	4.1						1414	-6.3	-2.1
1415	7.1	4.5						1415	-6.2	-1.9
1416	8.1	4.9						1416	-6.2	-1.6
1417	8.5	4.8						1417	-6.2	-1.4
1418	9	5.3						1418	-6.2	-1.1
1419	9	5.8						1419	-6.1	-0.9
1420	9.5	6.2						1420	-5.6	-0.6
1421	9.9	6.7						1421	-5	-0.4
1422	10.6	7.1						1422	-4.2	-0.1
1423	11.5	7.6						1423	-3.5	0.1
1424	12.3	7.9						1424	-2.6	0.3
1425	12.9	8.3						1425	-1.8	0.6
1426	12.9	8.6						1426	-1.1	0.9
1427	12.8	9						1427	-0.3	1.1
1428	12.4	9.4						1428	0.5	1.3
1429	12.3	9.9						1429	1.1	1.6
1430	12.6	10.1						1430	1.7	1.8
1431	12.8	10.1						1431	2.2	2
1432	12.7	9.9						1432	2.8	2.3
1433	12.2	10.2						1433	3.4	2.4
1434	11.6	10.8						1434	4	2.6
1435	11.5	11.4						1435	4.5	2.8
1436	11.7	10.5						1436	5.1	3
1437	11.5	9.8						1437	5.6	3.1
1438	10.6	9.1						1438	6.1	3.4
1439	9.6	8.6						1439	6.6	3.5
1440	8.7	8.1						1440	7.1	3.6
1441	7.4	8.2						1441	7.7	3.7
1442	6	8.2						1442	8.1	3.9
1443	5.1	7.8						1443	8.5	3.9
1444	4.4	7.6						1444	8.9	3.8
1445	4.1	7.4						1445	9.3	3.6
1446	3.8	7.7						1446	9.6	3.4
1447	3.6	7.7						1447	9.8	3.2
1448	3.4	7.6						1448	10	3.1
1449	3.3	7						1449	10.1	2.9
1450	2.9	6.4						1450	10.1	2.9
1451	2.7	6						1451	10.1	2.8
1452	2.4	5.6						1452	9.8	2.7
1453	2.1	5.1						1453	9.1	2.5
1454	1.8	4.7						1454	8.2	2.4
1455	1.5	4.4						1455	7.3	2.4
1456	1.3	4						1456	6.6	2.3
1457	1	3.8						1457	5.8	2.2
1458	0.7	3.4						1458	5.2	1.8
1459	0.4	3.3						1459	4.7	1.8
1460	0.3	3.1						1460	4.2	1.7
1461	0.2	2.9						1461	3.9	1.6
1462	0.1	2.6						1462	3.4	1.4
1463	0	2.3						1463	3.1	1.4
1464	-0.3	2.2						1464	2.9	1.3
1465	-0.4	2						1465	2.5	1.2
1466	-0.5	1.8						1466	2.3	1.1
1467	-0.6	1.7						1467	2.1	1
1468	-0.8	1.5						1468	1.9	0.9
1469	-1	1.4						1469	1.7	0.8
1470	-1.1	1.1						1470	1.5	0.7
1471	-1.2	1						1471	1.3	0.6
1472	-1.3	0.9						1472	1.1	0.6
1473	-1.4	0.8						1473	0.9	0.5
1474	-1.6	0.7						1474	0.8	0.4
1475	-1.6	0.6						1475	0.5	0.4
1476	-1.7	0.5						1476	0.4	0.3
1477	-1.8	0.2						1477	0.3	0.2
1478	-1.9	0.1						1478	0.1	0.1
1479	-2.1	0						1479	-0.1	0.1
1480	-2.2	-0.1						1480	-0.2	0
1481	-2.4	-0.2						1481	-0.3	-0.1
1482	-2.5	-0.3						1482	-0.4	-0.2
1483	-2.6	-0.5						1483	-0.5	-0.2
1484	-2.7	-0.6						1484	-0.7	-0.3
1485	-2.8	-0.8						1485	-0.8	-0.4
1486	-3	-0.8						1486	-0.9	-0.5
1487	-3.1	-0.9						1487	-1.1	-0.5
1488	-3.1	-1						1488	-1.2	-0.6
1489	-3.2	-1.2						1489	-1.3	-0.6
1490	-3.3	-1.4						1490	-1.5	-0.7
1491	-3.4	-1.5						1491	-1.6	-0.8
1492	-3.6	-1.7						1492	-1.7	-0.9
1493	-3.8	-1.9						1493	-1.8	-0.9
1494	-3.9	-1.9						1494	-1.9	-1
1495	-4	-2						1495	-2.2	-1.1
1496	-4.1	-2.1						1496	-2.3	-1.1
1497	-4.2	-2.2						1497	-2.4	-1.2
1498	-4.3	-2.4						1498	-2.5	-1.2
1499	-4.4	-2.3						1499	-2.6	-1.2
1500	-4.4	-2.5						1500	-2.7	-1.3
1501	-4.5	-2.5						1501	-2.8	-1.3
1502	-4.6	-2.6						1502	-2.9	-1.4
1503	-4.7	-2.7						1503	-3	-1.5
1504	-4.8	-2.7						1504	-3	-1.5
1505	-4.9	-2.9						1505	-3.1	-1.6
1506	-4.9	-3						1506	-3.2	-1.7
1507	-4.9	-3.2						1507	-3.2	-1.7
1508	-5	-3.2						1508	-3.3	-1.8
1509	-5.1	-3.3						1509	-3.4	-1.8
1510	-5.2	-3.4						1510	-3.4	-1.8
1511	-5.4	-3.5						1511	-3.5	-1.9
1512	-5.5	-3.6						1512	-3.5	-1.9
1513	-5.5	-3.7						1513	-3.7	-2
1514	-5.6	-3.8						1514	-3.8	-1.8
1515	-5.7	-3.7						1515	-3.9	-1.9
1516	-5.8	-3.7						1516	-3.9	-2
1517	-5.8	-3.8						1517	-4	-2
1518	-5.7	-3.8						1518	-4.1	-2.1
1519	-5.8	-3.8						1519	-4.2	-2.2
1520	-5.8	-3.9						1520	-4.1	-2.1
1521	-5.8	-4						1521	-4.2	-2.2
1522	-5.9	-3.9						1522	-4.2	-2.2
1523	-5.8	-4						1523	-4.3	-2.3
1524	-5.9	-4						1524	-4.4	-2.3
1525	-5.9	-3.9						1525	-4.5	-2.3
1526	-6	-4						1526	-4.5	-2.3
1527	-5.9	-4						1527	-4.6	-2.4
1528	-5.9	-4						1528	-4.7	-2.5
1529	-6	-4						1529	-4.7	-2.6
1530	-6	-4						1530	-4.8	-2.5
1531	-5.9	-3.9						1531	-4.8	-2.6
1532	-5.9	-3.9						1532	-4.9	-2.6
1533	-5.9	-3.9						1533	-5	-2.7
1534	-5.8	-3.7						1534	-5.1	-2.6
1535	-5.7	-3.6						1535	-5.1	-2.7
1536	-5.5	-3.5						1536	-5.1	-2.7
1537	-5.4	-3.2						1537	-5.1	-2.8
1538	-5.1	-3						1538	-5.2	-2.8
1539	-4.9	-2.9						1539	-5.2	-2.8
1540	-4.7	-2.5						1540	-5.3	-2.8
1541	-4.2	-2.2						1541	-5.4	-2.9
1542	-3.8	-1.9						1542	-5.3	-3
1543	-3.2	-1.6						1543	-5.4	-2.9
1544	-2.7	-1.2						1544	-5.5	-2.9
1545	-2.1	-0.9						1545	-5.5	-3
1546	-1.4	-0.6						1546	-5.6	-3
1547	-0.6	-0.2						1547	-5.6	-3
1548	0.1	0.2						1548	-5.7	-2.9
1549	0.9	0.6						1549	-5.6	-2.9
1550	1.8	0.9						1550	-5.7	-2.9
1551	2.6	1.2						1551	-5.7	-2.9
1552	3.2	1.5						1552	-5.8	-2.8
1553	3.7	1.8						1553	-5.7	-2.8
1554	4.1	2.2						1554	-5.8	-2.5
1555	4.5	2.5						1555	-5.8	-2.3
1556	4.9	2.7						1556	-5.8	-2.1
1557	5.4	3.1						1557	-5.8	-1.7
1558	5.7	3.4						1558	-5.9	-1.5
1559	6.4	3.9						1559	-5.8	-1.3
1560	7.3	4.2						1560	-5.8	-1.2
1561	8.2	4.6						1561	-5.8	-0.9
1562	9.2	5						1562	-5.7	-0.7
1563	9.8	5.4						1563	-5.3	-0.4
1564	9.9	5.5						1564	-4.6	-0.2
1565	9.9	5.7						1565	-3.9	0.1
1566	9.6	6.2						1566	-3.2	0.3
1567	9.6	6.6						1567	-2.5	0.6
1568	9.8	7.1						1568	-1.8	0.7
1569	10.2	7.6						1569	-1.1	1
1570	10.6	8.2						1570	-0.6	1.2
1571	11.2	8.6						1571	0	1.5
1572	11.6	9.2						1572	0.7	1.6
1573	11.8	9.8						1573	1.3	1.9
1574	12.2	10.2						1574	1.9	2.1
1575	12.5	10.7						1575	2.5	2.3
1576	12.6	11.1						1576	3.2	2.8
1577	12.5	11.7						1577	3.7	3
1578	12.4	11.9						1578	4.3	3.1
1579	12.2	12.3						1579	4.7	3.3
1580	11.9	12.6						1580	5.2	3.4
1581	11.7	13						1581	5.8	3.5
1582	11.2	12.7						1582	6.2	3.7
1583	10.8	12.5						1583	6.6	3.9
1584	10.1	11.6						1584	7	3.9
1585	9.1	10.9						1585	7.3	4
1586	8.2	10.1						1586	7.9	3.9
1587	7.3	9.8						1587	8.3	3.7
1588	6.4	10						1588	8.8	3.6
1589	5.9	10.2						1589	9.1	3.5
1590	5.6	10.8						1590	9.3	3.3
1591	5.4	10.3						1591	9.6	3.1
1592	5.2	9.4						1592	9.7	3
1593	4.9	8.7						1593	9.8	2.9
1594	4.4	8						1594	9.8	2.8
1595	3.9	7.3						1595	9.6	2.6
1596	3.5	6.9						1596	9	2.6
1597	3	6.1						1597	8.2	2.6
1598	2.6	5.8						1598	7.3	2.5
1599	2.2	5.6						1599	6.6	2.4
1600	1.9	5.3						1600	5.9	2.4
1601	1.8	3.1						1601	5.4	2.2
1602	0.2	2.8						1602	4.8	2.1
1603	0	2.6						1603	4.4	2.1
1604	-0.2	2.4						1604	3.9	2
1605	-0.5	2.2						1605	3.6	1.9
1606	-0.6	2						1606	3.4	1.8
1607	-0.7	1.8						1607	3.1	1.6
1608	-0.8	1.6						1608	2.8	1.6
1609	-0.9	1.4						1609	2.6	1.5
1610	-1.1	1.2						1610	2.4	1.4
1611	-1.3	1						1611	2.2	1.2
1612	-1.4	0.8						1612	2	1.2
1613	-1.6	0.7						1613	1.8	1.1
1614	-1.7	0.6						1614	1.7	1
1615	-1.8	0.4						1615	1.4	0.9
1616	-1.9	0.3						1616	1.3	0.9
1617	-2	0.2						1617	1.1	0.8
1618	-2.1	0.1						1618	0.9	0.7
1619	-2.3	0						1619	0.8	0.7
1620	-2.3	-0.1						1620	0.7	0.6
1621	-2.4	-0.1						1621	0.4	0.5
1622	-2.4	-0.2						1622	0.3	0.4
1623	-2.5	-0.2						1623	0.1	0.4
1624	-2.5	-0.3						1624	0	0.3
1625	-2.6	-0.4						1625	-0.1	0.2
1626	-2.7	-0.5						1626	-0.2	0.2
1627	-2.8	-0.6						1627	-0.4	0.1
1628	-2.9	-0.7						1628	-0.5	0
1629	-3	-0.9						1629	-0.6	0
1630	-3.1	-1						1630	-0.8	-0.1
1631	-3.2	-1.1						1631	-0.9	-0.1
1632	-3.2	-1.2						1632	-1	-0.1
1633	-3.3	-1.2						1633	-1.2	-0.2
1634	-3.4	-1.3						1634	-1.3	-0.2
1635	-3.5	-1.4						1635	-1.3	-0.3
1636	-3.6	-1.5						1636	-1.5	-0.4
1637	-3.6	-1.5						1637	-1.6	-0.4
1638	-3.7	-1.6						1638	-1.7	-0.5
1639	-3.8	-1.7						1639	-1.8	-0.6
1640	-3.9	-1.8						1640	-1.9	-0.6
1641	-4	-1.9						1641	-2.1	-0.7
1642	-3.9	-2						1642	-2.1	-0.7
1643	-4	-2.1						1643	-2.3	-0.8
1644	-4.1	-2.2						1644	-2.3	-0.7
1645	-4.2	-2.2						1645	-2.4	-0.8
1646	-4.3	-2.3						1646	-2.4	-0.8
1647	-4.4	-2.3						1647	-2.5	-0.9
1648	15.4	-2.4						1648	-2.6	-1
1649	13.2	13.2						1649	-2.7	-1
1650	11.1	12.1						1650	-2.8	-1.1
1651	9.5	8						1651	-2.8	-1.1
1652	0	0						1652	-2.9	-1.2
1653	-1.5	-0.9						1653	-3	-1.1
1654	-1.5	-0.6						1654	-3	-1.2
1655	-1.5	-0.4						1655	-3.1	-1.2
1656	-1.2	0.3						1656	-3.2	-1.3
1657	-5	0.8						1657	-3.3	-1.3
1658	-4.5	1.2						1658	-3.4	-1.2
1659	5.7	9.9						1659	-3.4	-1.2
1660	5.8	6.5						1660	-3.5	-1.3
1661	6.4	7.6						1661	-3.6	-1.3
1662	6.6	7.7						1662	-3.6	-1.4
1663	6.9	8.1						1663	-3.6	-1.4
1664	7.5	8.8						1664	-3.7	-1.4
1665	7.7	9.1						1665	-3.7	-1.4
1666	8	9.5						1666	-3.8	-1.5
1667	8.1	9.5						1667	-3.8	-1.5
1668	8.5	10.1						1668	-3.9	-1.6
1669	9	10.6						1669	-4	-1.7
1670	9.4	11.3						1670	-4	-1.6
1671	8.9	10.9						1671	-4.1	-1.7
1672	8.4	10.3						1672	-4.1	-1.7
1673	7.8	10.2						1673	-4.2	-1.7
1674	7.3	9.9						1674	-4.2	-1.8
1675	7	10.4						1675	-4.3	-1.8
1676	6.6	10.2						1676	-4.3	-1.8
1677	6.1	10.4						1677	-4.4	-1.8
1678	5.6	9.9						1678	-4.4	-1.9
1679	5.1	9.3						1679	-4.4	-1.9
1680	4.5	8.9						1680	-4.5	-2
1681	3.8	8.3						1681	-4.5	-2
1682	3.3	8						1682	-4.6	-2
1683	3	7.5						1683	-4.6	-2
1684	2.6	6.9						1684	-4.7	-2
1685	2.3	6.6						1685	-4.8	-2
1686	2	6.3						1686	-4.8	-2.1
1687	1.8	5.9						1687	-4.9	-2.1
1688	1.6	5.6						1688	-4.9	-2.1
1689	1.3	5.4						1689	-4.9	-2.1
1690	0.9	5						1690	-4.9	-2
1691	0.3	4.5						1691	-5	-2
1692	-1	3.9						1692	-5	-2
1693	-2.2	3						1693	-5	-2
1694	-3	1.7						1694	-5.1	-1.9
1695	-3.3	1						1695	-5	-1.8
1696	-3.7	0.2						1696	-5.1	-1.6
1697	-4	-0.5						1697	-5.1	-1.4
1698	-4.3	-1.3						1698	-5.1	-1.2
1699	-4.5	-2						1699	-5.1	-0.9
1700	-4.7	-2.3						1700	-5.1	-0.8
1701	-4.8	-2.8						1701	-5.1	-0.5
1702	-5	-2.9						1702	-4.9	-0.3
1703	-5	-3						1703	-4.9	-0.1
1704	-5.1	-3.1						1704	-4.9	0.1
1705	-5.1	-3.1						1705	-4.8	0.3
1706	-5.2	-3						1706	-4.3	0.6
1707	-5.2	-3.1						1707	-3.7	0.8
1708	-5.2	-3.2						1708	-3.1	0.9
1709	-5.2	-3.2						1709	-2.5	1.2
1710	-5.3	-3.3						1710	-1.9	1.5
1711	-5.3	-3.5						1711	-1.3	1.7
1712	-5.4	-3.7						1712	-0.7	2
1713	-5.6	-3.8						1713	-0.1	2.2
1714	-5.7	-4						1714	0.5	2.3
1715	-5.8	-4.2						1715	1	2.5
1716	-5.9	-4.1						1716	1.5	2.6
1717	-5.8	-4.1						1717	1.9	2.8
1718	-5.9	-4.1						1718	2.5	3.1
1719	-6	-4.3						1719	2.9	3.2
1720	-6.3	-4.8						1720	3.4	3.4
1721	-6.4	-5.1						1721	3.8	3.6
1722	-6.6	-5.3						1722	4.4	3.7
1723	-6.6	-5.5						1723	4.8	3.9
1724	-6.8	-5.7						1724	5.2	4.1
1725	-7	-6						1725	5.6	4.2
1726	-7.2	-6.2						1726	6	4.3
1727	-7.4	-6.4						1727	6.3	4.4
1728	-7.6	-6.6						1728	6.7	4.5
1729	-7.5	-6.8						1729	7	4.5
1730	-7.6	-6.9						1730	7.1	4.4
1731	-7.7	-6.9						1731	7.4	4.2
1732	-7.7	-7						1732	7.6	4
1733	-7.8	-7						1733	7.7	3.9
1734	-7.7	-6.9						1734	7.9	3.8
1735	-7.7	-6.9						1735	8	3.5
1736	-7.7	-6.9						1736	8.1	3.4
1737	-7.7	-6.8						1737	8.3	3.3
1738	-7.6	-6.9						1738	8.2	3.2
1739	-7.7	-7						1739	7.8	3.1
1740	-7.7	-7						1740	7.2	3.1
1741	-7.8	-7						1741	6.6	3
1742	-7.7	-6.9						1742	6.1	2.9
1743	-7.7	-6.9						1743	5.5	2.7
1744	-7.7	-6.9						1744	5.1	2.6
1745	-7.6	-6.7						1745	4.6	2.5
1746	-7.4	-6.6						1746	4.3	2.4
1747	-7.4	-6.3						1747	3.9	2.3
1748	-7.4	-6.3						1748	3.6	2.2
1749	-7.4	-6.3						1749	3.3	2.1
1750	-7.3	-6.4						1750	3.1	2
1751	-7.3	-6.5						1751	2.9	1.9
1752	-7.4	-6.4						1752	2.6	1.8
1753	-7.3	-6.4						1753	2.4	1.7
1754	-7.2	-6.2						1754	2.2	1.6
1755	-7.2	-6.1						1755	2	1.5
1756	-7.2	-6.1						1756	1.8	1.4
1757	-7.1	-5.9						1757	1.6	1.3
1758	-7	-5.9						1758	1.5	1.1
1759	-6.9	-5.8						1759	1.2	1.1
1760	-6.8	-5.7						1760	1.1	1
1761	-6.6	-5.6						1761	0.9	0.9
1762	-6.6	-5.4						1762	0.8	0.8
1763	-6.5	-5.2						1763	0.6	0.7
1764	-6.2	-4.9						1764	0.4	0.7
1765	-6.1	-4.8						1765	0.3	0.6
1766	-6.1	-4.7						1766	0.1	0.5
1767	-5.9	-4.5						1767	-0.1	0.5
1768	-5.8	-4.4						1768	-0.3	0.4
1769	-5.8	-4.3						1769	-0.3	0.4
1770	-5.7	-4.2						1770	-0.5	0.3
1771	-5.6	-4						1771	-0.6	0.3
1772	-5.4	-3.9						1772	-0.7	0.2
1773	-5.3	-3.6						1773	-0.9	0.1
1774	-5.1	-3.5						1774	-1	0.1
1775	-4.7	-3.2						1775	-1.2	0
1776	-4.3	-3						1776	-1.2	0
1777	-3.8	-2.7						1777	-1.3	-0.1
1778	-3.2	-2.4						1778	-1.4	-0.1
1779	-2.5	-1.9						1779	-1.5	-0.2
1780	-2.1	-1.7						1780	-1.6	-0.2
1781	-1.8	-1.5						1781	-1.7	-0.2
1782	-1.3	-1.2						1782	-1.8	-0.3
1783	-0.8	-0.8						1783	-2	-0.4
1784	-0.2	-0.5						1784	-2	-0.4
1785	0.3	-0.3						1785	-2.1	-0.4
1786	0.5	0						1786	-2.1	-0.4
1787	0.6	0.3						1787	-2.2	-0.5
1788	0.7	0.5						1788	-2.2	-0.6
1789	1	0.7						1789	-2.4	-0.7
1790	1.5	1						1790	-2.6	-0.7
1791	2.3	1.4						1791	-2.7	-0.8
1792	2.9	1.9						1792	-2.7	-0.7
1793	3.3	2.1						1793	-2.8	-0.8
1794	3.4	2.2						1794	-2.8	-0.9
1795	2.8	2.2						1795	-3	-1
1796	1.7	2.1						1796	-3	-1
1797	1.2	2.1						1797	-3.1	-1.1
1798	1	2.1						1798	-3.2	-1
1799	1.2	2.3						1799	-3.2	-1.1
1800	1.7	2.7						1800	-3.3	-1.2
1801	2.7	3.5						1801	-3.3	-1.2
1802	3.4	3.8						1802	-3.4	-1.3
1803	3.3	3.7						1803	-3.5	-1.2
1804	3.1	3.6						1804	-3.5	-1.3
1805	2.6	3.5						1805	-3.6	-1.4
1806	2.2	3.5						1806	-3.7	-1.4
1807	1.7	3.4						1807	-3.8	-1.5
1808	1.1	3.4						1808	-3.8	-1.4
1809	0.6	3.3						1809	-3.9	-1.5
1810	0.5	3.2						1810	-4	-1.6
1811	0.6	3.4						1811	-4	-1.5
1812	0.7	3.5						1812	-4.1	-1.5
1813	1.1	3.8						1813	-4.2	-1.6
1814	1.5	4.2						1814	-4.2	-1.6
1815	1.9	4.5						1815	-4.3	-1.7
1816	2.3	5						1816	-4.4	-1.7
1817	2.4	5.4						1817	-4.4	-1.8
1818	2.2	5.2						1818	-4.5	-1.8
1819	2.1	5						1819	-4.6	-1.9
1820	1.8	4.9						1820	-4.6	-1.9
1821	1.6	4.7						1821	-4.7	-1.9
1822	1.5	4.7						1822	-4.7	-1.9
1823	1.3	4.9						1823	-4.7	-2.3
1824	1.2	4.6						1824	-4.8	-2.3
1825	1.1	4.5						1825	-4.9	-2.4
1826	0.9	4.2						1826	-4.9	-2.5
1827	0.7	4.1						1827	-5	-2.6
1828	0.5	3.6						1828	-5.1	-2.6
1829	0.2	3.5						1829	-5.1	-2.6
1830	0	3.2						1830	-5.1	-2.7
1831	-0.3	2.9						1831	-5.2	-2.7
1832	-1	2.6						1832	-5.2	-2.7
1833	-1.8	2.2						1833	-5.3	-2.7
1834	-2.5	1.3						1834	-5.3	-2.7
1835	-3	0.5						1835	-5.4	-2.7
1836	-3.4	-0.4						1836	-5.5	-2.6
1837	-3.8	-1.1						1837	-5.5	-2.6
1838	-4.1	-1.5						1838	-5.6	-2.5
1839	-4.3	-1.7						1839	-5.5	-2.3
1840	-4.4	-1.6						1840	-5.5	-2.1
1841	-4.5	-1.8						1841	-5.6	-1.9
1842	-4.5	-2						1842	-5.6	-1.7
1843	-4.6	-2.3						1843	-5.6	-1.5
1844	-4.7	-2.5						1844	-5.5	-1.2
1845	-4.8	-2.5						1845	-5.5	-1
1846	-4.9	-2.6						1846	-5.5	-0.8
1847	-5	-2.6						1847	-5.4	-0.5
1848	-5.1	-2.7						1848	-0.2	1.5
1849	-5.2	-2.8						1849	-0.1	-3.2
1850	-5.1	-2.8						1850	-0.1	-3.2
1851	-5.2	-2.8						1851	-0.1	-3.2
1852	-5.3	-2.8						1852	0.1	-3.3
1853	-5.3	-2.9						1853	0.1	-3.3
1854	-5.3	-2.8						1854	-6.1	-3.2
1855	-5.3	-2.8						1855	-6.1	-3.2
1856	-5.3	-2.8						1856	-5.9	-3.1
1857	-5.3	-2.7						1857	-5.9	-3
1858	-5.2	-2.7						1858	-5.8	-3
1859	-5.2	-2.7						1859	-5.7	-2.9
1860	-5.2	-2.7						1860	-5.5	-2.9
1861	-5.2	-2.6						1861	-5.4	-2.8
1862	-5.3	-2.6						1862	-5.1	-2.6
1863	-5.3	-2.6						1863	-4.6	-2.4
1864	-5.2	-2.7						1864	-3.9	-2.1
1865	-5.3	-2.7						1865	-3.3	-1.9
1866	-5.3	-2.6						1866	-2.7	-1.6
1867	-5.4	-2.7						1867	-2.1	-1.4
1868	-5.4	-2.7						1868	-1.5	-1.1
1869	-5.5	-2.7						1869	-0.8	-0.8
1870	-5.3	-2.7						1870	-0.2	-0.6
1871	-5.3	-2.7						1871	0.4	-0.3
1872	-5.3	-2.7						1872	0.9	0
1873	-5.3	-2.7						1873	1.4	0.2
1874	-5.3	-2.7						1874	2	0.5
1875	-5.3	-2.8						1875	2.6	0.7
1876	-5.4	-2.7						1876	3.1	1.1
1877	-5.4	-2.8						1877	3.7	1.4
1878	-5.5	-2.9						1878	4.1	1.6
1879	-5.5	-2.9						1879	4.5	1.9
1880	-5.5	-2.9						1880	4.9	2.1
1881	-5.5	-3						1881	5.3	2.3
1882	-5.6	-3.2						1882	5.6	2.6
1883	-5.6	-3.2						1883	6	2.8
1884	-5.6	-3.3						1884	6.3	3.1
1885	-5.5	-3.2						1885	6.5	3.3
1886	-5.6	-3.4						1886	6.8	3.5
1887	-5.6	-3.5						1887	7.1	3.7
1888	-5.7	-3.6						1888	7.3	3.9
1889	-5.6	-3.7						1889	7.5	4.2
1890	-5.7	-3.7						1890	7.8	4.3
1891	-5.7	-3.9						1891	8	4.4
1892	-5.7	-3.9						1892	8.2	4.6
1893	-5.6	-4						1893	8.3	4.7
1894	-5.7	-3.9						1894	8.4	4.8
1895	-5.7	-3.9						1895	8	4.6
1896	-5.7	-3.8						1896	7.3	4.5
1897	-5.7	-3.8						1897	6.6	4.3
1898	-5.6	-3.7						1898	5.9	4.2
1899	-5.6	-3.6						1899	5.1	4
1900	-5.6	-3.5						1900	4.5	3.9
1901	-5.6	-3.5						1901	4	3.8
1902	-5.4	-3.4						1902	3.4	3.6
1903	-5.4	-3.3						1903	3	3.6
1904	-5.4	-3.2						1904	2.6	3.5
1905	-5.4	-3.2						1905	2.3	3.3
1906	-5.2	-3.2						1906	2	3.2
1907	-5.2	-3.2						1907	1.8	3.2
1908	-5.1	-3.1						1908	1.5	3
1909	-5	-3						1909	1.3	2.9
1910	-4.7	-2.8						1910	1.1	2.9
1911	-4.5	-2.7						1911	1	2.7
1912	-4.3	-2.6						1912	0.7	2.6
1913	-4.1	-2.4						1913	0.5	2.6
1914	-3.8	-2.2						1914	0.4	2.4
1915	-3.3	-2						1915	0.3	2.3
1916	-2.9	-1.6						1916	0.1	2.2
1917	-2.7	-1.4						1917	-0.1	2.1
1918	-2.4	-1.3						1918	-0.2	1.9
1919	-2.1	-1.1						1919	-0.4	1.8
1920	-1.7	-0.8						1920	-0.6	1.8
1921	-3	-0.5						1921	-0.7	1.7
1922	-2.8	-0.3						1922	-0.8	1.6
1923	-2.5	0						1923	-0.8	1.5
1924	-2.2	0.3						1924	-1	1.4
1925	1.3	3.6						1925	-1	1.4
1926	1.5	3.8						1926	-1	1.3
1927	1.6	3.9						1927	-1	1.3
1928	1.7	4						1928	-1.1	1.3
1929	1.8	4.1						1929	-1.1	1.2
1930	2.1	4.5						1930	-1.1	1.1
1931	2.4	4.8						1931	-1.2	1.1
1932	3.1	5.5						1932	-1.2	1
1933	3.4	5.8						1933	-1.4	1
1934	3.7	6.1						1934	-1.5	1
1935	4	6.5						1935	-1.5	0.9
1936	4.1	6.6						1936	-1.6	0.9
1937	4.3	6.8						1937	-1.6	0.7
1938	4.9	7.3						1938	-1.7	0.7
1939	5.6	8						1939	-1.8	0.6
1940	6.1	8.5						1940	-1.8	0.5
1941	6.7	9.1						1941	-1.9	0.5
1942	7.3	9.7						1942	-1.9	0.5
1943	7.7	10.1						1943	-2	0.4
1944	8.2	10.6						1944	-2	0.4
1945	8.5	11.1						1945	-2.1	0.3
1946	8.4	11						1946	-2.2	0.3
1947	8.2	10.7						1947	-2.3	0.2
1948	8.2	10.7						1948	-2.3	0.1
1949	7.4	9.9						1949	-2.4	0.1
1950	6.8	9.3						1950	-2.4	0
1951	6.1	8.7						1951	-2.5	-0.1
1952	5.2	7.7						1952	-2.6	-0.1
1953	2.9	5.4						1953	-2.6	-0.2
1954	1	3.5						1954	-2.7	-0.3
1955	0.7	3.2						1955	-2.8	-0.3
1956	0.8	3.3						1956	-2.9	-0.4
1957	0.9	3.4						1957	-2.9	-0.5
1958	2.3	4.8						1958	-3	-0.5
1959	2.3	4.7						1959	-2.9	-0.6
1960	2.2	4.6						1960	-3	-0.6
1961	1.8	4.3						1961	-3.1	-0.6
1962	1.6	4.1						1962	-3.1	-0.7
1963	1.4	3.8						1963	-3.2	-0.7
1964	1.2	3.6						1964	-3.3	-0.8
1965	1	3.3						1965	-3.4	-0.9
1966	0.9	3.2						1966	-3.4	-0.9
1967	0.6	3						1967	-3.5	-1
1968	0.3	2.7						1968	-3.5	-1.1
1969	0.1	2.4						1969	-3.6	-1.2
1970	0	2.3						1970	-3.7	-1.2
1971	-0.1	2.2						1971	-3.7	-1.3
1972	-0.3	2						1972	-3.8	-1.3
1973	-0.4	1.8						1973	-3.9	-1.4
1974	-0.6	1.6						1974	-3.9	-1.4
1975	-0.7	1.5						1975	-4	-1.5
1976	-0.9	1.3						1976	-3.9	-1.5
1977	-1.1	1.2						1977	-4	-1.6
1978	-1.2	1						1978	-4.1	-1.7
1979	-1.3	0.9						1979	-4.2	-1.6
1980	-1.3	0.9						1980	-4.2	-1.7
1981	-1.4	0.8						1981	-4.3	-1.7
1982	-1.5	0.7						1982	-4.3	-1.8
1983	-1.6	0.6						1983	-4.4	-1.9
1984	-1.7	0.5						1984	-4.4	-1.9
1985	-1.8	0.4						1985	-4.5	-1.9
1986	-1.8	0.4						1986	-4.6	-1.9
1987	-1.9	0.3						1987	-4.5	-2
1988	-2.1	0.1						1988	-4.6	-2.1
1989	-2.2	0						1989	-4.7	-2.1
1990	-2.3	-0.1						1990	-4.7	-2.1
1991	-2.4	-0.2						1991	-4.6	-2.1
1992	-2.5	-0.3						1992	-4.7	-2.2
1993	-2.5	-0.3						1993	-4.7	-2.2
1994	-2.6	-0.4						1994	-4.8	-2.3
1995	-2.7	-0.5						1995	-4.8	-2.2
1996	-2.8	-0.6						1996	-4.8	-2.3
1997	-2.8	-0.6						1997	-4.8	-2.3
1998	-2.9	-0.7						1998	-4.8	-2.3
1999	-3	-0.8						1999	-4.8	-2.3
[truncated: 10,806 more rows]
