# Supplementary material for: Vertical Gradient Temperature Difference of the Main Arch with Single Pipe Section in Tibet Based on Statistical Analysis
Source: Hindawi journal article supplement (doi:10.1155/2020/9767621), 2020-01-01
Supplement: f1 [file 9767621.f1.zip › 9767621.f1/fig.9.xls]

## Sheet: Sheet1
summer	T1		T2		winter	T1		T2
-8.5	0.00237	-9.5	0.00185		-7.5	0.0029	-4.5	0.0058
-7.5	0.01281	-8.5	0.00277		-6.5	0.03018	-3.5	0.06115
-6.5	0.01068	-7.5	0.0116		-5.5	0.08711	-2.5	0.11334
-5.5	0.01874	-6.5	0.04218		-4.5	0.1252	-1.5	0.13072
-4.5	0.07189	-5.5	0.09043		-3.5	0.11268	-0.5	0.14019
-3.5	0.1331	-4.5	0.12843		-2.5	0.09278	0.5	0.12622
-2.5	0.15516	-3.5	0.13357		-1.5	0.10424	1.5	0.13375
-1.5	0.11056	-2.5	0.10349		-0.5	0.07617	2.5	0.07195
-0.5	0.07568	-1.5	0.09004		0.5	0.06563	3.5	0.07823
0.5	0.05599	-0.5	0.0725		1.5	0.06181	4.5	0.04991
1.5	0.0624	0.5	0.0725		2.5	0.04968	5.5	0.03295
2.5	0.05741	1.5	0.06709		3.5	0.0402	6.5	0.02911
3.5	0.04579	2.5	0.04945		4.5	0.03571	7.5	0.01185
4.5	0.03772	3.5	0.03705		5.5	0.02939	8.5	0.00909
5.5	0.03321	4.5	0.03217		6.5	0.0282
6.5	0.02586	5.5	0.01325		7.5	0.02728
7.5	0.02444	6.5	0.01351		8.5	0.01647
8.5	0.01851	7.5	0.01147		9.5	0.01002
9.5	0.01542	8.5	0.00732		10.5	0.00277
10.5	0.00783	9.5	0.00626		11.5	0.00158
11.5	0.00641	10.5	0.00468
12.5	0.00569	11.5	0.00382
13.5	0.00522	12.5	0.00297
14.5	0.00285	13.5	0.00126
15.5	0.00214
16.5	0.00119
